# Supplementary material for: Synthesis of asymmetric [bis(imidazolyl)-BH2]+-cation-based ionic liquids as potential rocket fuels
Source: Royal Society of Chemistry journal article supplement (doi:10.1039/d1ra07149a), 2021-01-01
Supplement: d1ra07149a1.pdf [file d1ra07149a1.pdf]

## Supplementary Material

### Novel Asymmetric Boronium-Cation-Based Ionic Liquids Synthesized for Hypergolic Fuels

Xue Li,<sup>[a]</sup> Yin Zhang,<sup>[a]</sup> Hongping Li,<sup>[b]</sup> Jing Ding,<sup>[a]</sup> Hui Wan,<sup>\*[a]</sup> Guofeng Guan<sup>\*[a]</sup>

[a] State Key Laboratory of Materials-Oriented Chemical Engineering, College of Chemical Engineering, Jiangsu National Synergetic Innovation Center for Advanced Materials, Jiangsu Collaborative Innovation Center for Advanced Inorganic Function Composites, Nanjing Tech University, Nanjing 210009, P.R. China

[b] Institute for Energy Research of Jiangsu University, Jiangsu University, Jiangsu 212013, China

\*Corresponding author:

Hui Wan, E-mail address: [wanhui@njtech.edu.cn](mailto:wanhui@njtech.edu.cn) Tel:+86 25 83587198

Guofeng Guan, E-mail address : [guangf@njtech.edu.cn](mailto:guangf@njtech.edu.cn) Tel:+86 25 83587198

# Contents

Synthesis procedure .....S1

NMR and HRMS-ESI Spectra.....S7

Computational details.....S46

## 1.Synthesis procedure

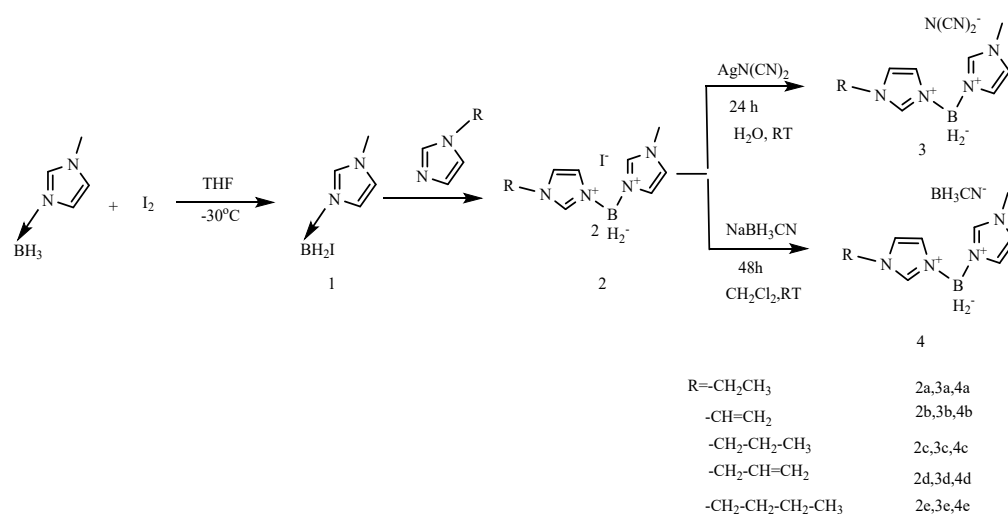

**Figure S1** The synthetic route for the asymmetric boronium-cation-based ionic liquids

### Synthesis of 1-methylimidazole borane complex

The product was a colorless liquid; yield, 92 %.  $^1\text{H}$  NMR(DMSO- $d_6$ , 400 MHz):  $\delta= 1.77 - 2.47$  (m, 3H,  $\text{BH}_3$ ), 3.67 – 3.72 (s, 3H,  $\text{CH}_3$ ), 6.96 – 7.03 (s, 1H, N-CH=CH-N), 7.24 – 7.36 (s, 1H, N-CH=CH-N), 7.92 – 8.40 ppm (s, 1H, N-CH=N);  $^{13}\text{C}$  NMR (101 MHz, Deuterium Oxide)  $\delta = 34.24, 122.07, 126.31, 137.78$  ppm; IR (KBr):  $\tilde{\nu}= 3137, 2358, 2309, 2262, 1549, 1301, 1174, 831, 748$   $\text{cm}^{-1}$

### Synthesis of (1-ethyl-1H-imidazol-3-ium-1-yl)(1-methyl-1H-imidazol-3-ium-1-yl) dihydroboronium iodide (2a)

The product 2a was a viscous transparent liquid; yield, 42 %.  $^1\text{H}$  NMR(DMSO- $d_6$ , 400 MHz):  $\delta= 1.32 - 1.45$  (s, 3H,  $\text{CH}_3$ ), 3.79 – 3.84 (s, 3H,  $\text{CH}_3$ ), 4.07 – 4.25 (s, 2H,  $\text{CH}_2$ ), 7.37 – 7.43 (d, 2H, N-CH=CH-N), 7.53 – 7.59 (s, 1H, N-CH=CH-N), 7.66 – 7.70 (s, 1H, N-CH=CH-N), 8.73 – 8.80 (s, 1H, N-CH=N), 8.80 – 8.90 ppm (s, 1H, N-CH=N);  $^{13}\text{C}$  NMR (101 MHz, DMSO- $d_6$ )  $\delta = 15.34, 34.97, 43.19, 121.92, 123.39, 124.76, 124.85, 137.80, 138.74$  ppm; IR (KBr):  $\tilde{\nu}= 3445, 3113, 3068, 2959, 2876, 2427, 1544, 1162, 1128$   $\text{cm}^{-1}$ .

### Synthesis of (1-methyl-1H-imidazol-3-ium-1-yl)(1-vinyl-1H-imidazol-3-ium-1-yl) dihydroboronium iodide (2b)

The product 2b was a viscous transparent liquid; yield, 40 %. <sup>1</sup>H NMR(DMSO-*d*<sub>6</sub>, 400 MHz): δ= 3.60 – 3.87 (s, 3H, CH<sub>3</sub>), 5.24 – 5.35 (dt, 1H, CH<sub>2</sub>=CH), 5.83 – 5.93 (dd, 1H, CH=CH), 7.17 – 7.28 (dd, 1H, CH<sub>2</sub>=CH), 7.36 – 7.42 (t, 1H, N-CH=CH-N), 7.49 – 7.56 (m, 2H, N-CH=CH-N), 8.01 – 8.06 (s, 1H, N-CH=CH-N), 8.65 – 8.70 (s, 1H, N-CH=N), 9.01 – 9.06 ppm (s, 1H, N-CH=N); <sup>13</sup>C NMR (101 MHz, DMSO-*d*<sub>6</sub>) δ = 35.45, 107.59, 119.60, 124.03, 125.38, 126.27, 129.41, 138.01, 139.48 ppm; IR:  $\tilde{\nu}$ = 3433, 3124, 2972, 2928, 2892, 2433, 1537, 1161, 1130 cm<sup>-1</sup>.

**Synthesis of (1-methyl-1H-imidazol-3-ium-1-yl)(1-propyl-1H-imidazol-3-ium-1-yl) dihydroboronium iodide (2c)**

The product 2c was a viscous transparent liquid; yield, 44% . <sup>1</sup>H NMR(DMSO-*d*<sub>6</sub>, 400 MHz): δ= 0.74 – 0.85 (td, 3H, CH<sub>3</sub>), 1.68 – 1.86 (m, 2H, CH<sub>2</sub>), 3.76 – 3.85 (s, 3H, CH<sub>3</sub>), 4.02 – 4.12 (q, 2H,CH<sub>2</sub>), 7.34 – 7.38 (d, 1H, N-CH=CH-N), 7.38 – 7.42 (d, 1H, N-CH=CH-N), 7.52 – 7.58 (d, 1H, N-CH=CH-N), 7.61 – 7.68 (d, 1H, N-CH=CH-N ), 8.66 – 8.75 (s, 1H, N-CH=N), 8.75 – 8.86 ppm (s, 1H, N-CH=N) <sup>13</sup>C NMR (101 MHz, DMSO-*d*<sub>6</sub>) δ = 10.48, 22.99, 34.95, 49.42, 122.32, 123.51, 124.79, 124.95, 138.18, 138.82 ppm; IR (KBr):  $\tilde{\nu}$ = 3445, 3113, 3068, 2965, 2876, 2427, 1544, 1161, 1129 cm<sup>-1</sup>.

**Synthesis of (1-allyl-1H-imidazol-3-ium-1-yl)(1-methyl-1H-imidazol-3-ium-1-yl) dihydroboronium iodide (2d)**

The product 2d was a viscous transparent liquid; yield, 42%. <sup>1</sup>H NMR (400 MHz, DMSO-*d*<sub>6</sub>) :δ= 3.75 – 3.83 (s, 3H, CH<sub>3</sub>), 4.74 – 4.83 (dt, 2H, CH<sub>2</sub>), 5.18 – 5.34 (m, 2H, CH<sub>2</sub>), 5.92 – 6.10 (m, 1H, CH), 7.35 – 7.40 (s, 1H, N-CH=CH-N), 7.40 – 7.44 (s, 1H, N-CH=CH-N), 7.53 – 7.56 (s, 1H, N-CH=CH-N), 7.56 – 7.60 (s, 1H, N-CH=CH-N), 8.69 – 8.75 (s, 1H, N-CH=N), 8.75 – 8.81 ppm (s, 1H, N-CH=N); <sup>13</sup>C NMR (101 MHz, DMSO-*d*<sub>6</sub>) δ = 34.95, 50.05, 119.58, 122.34, 123.49, 124.83, 125.10, 132.31, 138.19, 138.85 ppm; IR:  $\tilde{\nu}$ = 3478, 3110, 2941, 2426, 1542, 1423, 1160, 1124 cm<sup>-1</sup>.

**Synthesis of (1-butyl-1H-imidazol-3-ium-1-yl)(1-methyl-1H-imidazol-3-ium-1-yl) dihydroboronium iodide (2e)**

The product 2e was a viscous transparent liquid; yield, 42 %. <sup>1</sup>H NMR(DMSO-*d*<sub>6</sub>, 400 MHz): δ= 0.76 – 0.91 (t, 3H, CH<sub>3</sub>), 1.14 – 1.26 (dt, 2H, CH<sub>2</sub>), 1.68 – 1.80 (p, 2H,

CH<sub>2</sub>), 3.78 – 3.80 (s, 3H, CH<sub>3</sub>), 4.05 – 4.15 (t, 2H, CH<sub>2</sub>), 7.36 – 7.38 (m, 1H, N-CH=CH-N), 7.38 – 7.41 (t, 1H, N-CH=CH-N), 7.54 – 7.56 (s, 1H, N-CH=CH-N), 7.58 – 7.69 (s, 1H, N-CH=CH-N), 8.71 – 8.73 (s, 1H, N-CH=N), 8.76 – 8.88 ppm (s, 1H, N-CH=N); <sup>13</sup>C NMR (101 MHz, DMSO-*d*<sub>6</sub>) δ = 13.77, 19.37, 32.0, 35.48, 48.16, 122.81, 124.00, 125.30, 125.45, 138.64, 139.32 ppm; IR (KBr):  $\tilde{\nu}$  = 3112, 3068, 2959, 2933, 2870, 2427, 1543, 1161, 1128 cm<sup>-1</sup>.

### Synthesis of (1-ethyl-1H-imidazol-3-ium-1-yl)(1-methyl-1H-imidazol-3-ium-1-yl) dihydroboronium dicyandiamide (3a)

The aqueous solution of **2a** (20 mmol) in 40 ml H<sub>2</sub>O was added dropwise into the suspension of silver dicyanamide (4.18 g, 24 mmol) in 60 ml H<sub>2</sub>O. In the absence of light, the mixture should be with vigorously stirring for 24h. After filtration, the water could be removed by rotary evaporation to get a viscous transparent liquid **3a**. 85% Yield. <sup>1</sup>H NMR (400 MHz, DMSO-*d*<sub>6</sub>) : δ = 1.35 – 1.46 (td, 3H, CH<sub>3</sub>), 3.77 – 3.82 (s, 3H, CH<sub>3</sub>), 4.09 – 4.19 (s, 2H, CH<sub>2</sub>), 7.33 – 7.43 (m, 2H, N-CH=CH-N), 7.50 – 7.59 (s, 1H, N-CH=CH-N), 7.60 – 7.72 (s, 1H, N-CH=CH-N), 8.65 – 8.71 (s, 1H, N-CH=N), 8.72 – 8.80 ppm (s, 1H, N-CH=N); <sup>13</sup>C NMR (101 MHz, DMSO-*d*<sub>6</sub>) δ = 15.77, 35.31, 43.72, 119.56, 122.45, 123.96, 125.41 (d, *J* = 9.8), 138.35, 139.30 ppm; <sup>11</sup>B NMR (193 MHz, DMSO-*d*<sub>6</sub>) δ = -9.20 ppm; IR (KBr):  $\tilde{\nu}$  = 3487, 3135, 3079, 2987, 2429, 2239, 2130, 1546, 1161, 1129 cm<sup>-1</sup>; HRMS (ESI) *m/z*: [M]<sup>+</sup> calcd for C<sub>9</sub>H<sub>18</sub>BN<sub>4</sub><sup>+</sup>: 191.14625, found: 191.14568. [M]<sup>-</sup> calcd for C<sub>2</sub>N<sub>3</sub><sup>-</sup>: 66.00867, found: 66.00907.

### Synthesis of (1-methyl-1H-imidazol-3-ium-1-yl)(1-vinyl-1H-imidazol-3-ium-1-yl) dihydroboronium dicyandiamide (3b)

The following compound was all synthesized like **3a**. The product **3b** was a viscous transparent liquid; yield, 90%. <sup>1</sup>H NMR (400 MHz, DMSO-*d*<sub>6</sub>) : δ = 3.74 – 3.84 (s, 3H, CH<sub>3</sub>), 5.24 – 5.35 (dt, 1H, CH), 5.83 – 5.93 (dd, 1H, CH), 7.17 – 7.28 (dd, 1H, CH), 7.36 – 7.42 (t, 1H, N-CH=CH-N), 7.49 – 7.56 (m, 2H, N-CH=CH-N), 8.01 – 8.06 (s, 1H, N-CH=CH-N), 8.65 – 8.70 (s, 1H, N-CH=N), 9.01 – 9.06 (s, 1H, N-CH=N). <sup>13</sup>C NMR (101 MHz, DMSO-*d*<sub>6</sub>) δ = 34.89, 107.07, 119.10, 123.54, 124.94, 125.80, 128.96, 137.57, 139.02 ppm; <sup>11</sup>B NMR (193 MHz, DMSO-*d*<sub>6</sub>) δ = -8.42 ppm; IR (KBr):  $\tilde{\nu}$  = 3483, 3135, 3077, 2957, 2872, 2432, 2237, 2136, 1538, 1161, 1130 cm<sup>-1</sup>;

HRMS (ESI)  $m/z$ :  $[M]^+$  calcd for  $C_9H_{16}BN_4^+$ : 189.13060, found: 189.13036.  $[M]^-$  calcd for  $C_2N_3^-$ :66.00867,found: 66.00966.

### **Synthesis of (1-methyl-1H-imidazol-3-ium-1-yl)(1-propyl-1H-imidazol-3-ium-1-yl) dihydroboronium dicyandiamide (3c)**

The product **3c** was a viscous transparent liquid; yield,87%.  $^1H$  NMR (400 MHz, DMSO- $d_6$ ) : $\delta$  = 0.79 – 0.85 (td, 3H,  $CH_3$ ), 1.74 – 1.83 (q, 2H,  $CH_2$ ), 3.75 – 3.82 (s, 3H,  $CH_3$ ), 4.02 – 4.10 (m, 2H,  $CH_2$ ), 7.33 – 7.37 (s, 1H, N-CH=CH-N), 7.37 – 7.42 (s, 1H, N-CH=CH-N), 7.49 – 7.55 (s, 1H, N-CH=CH-N), 7.59 – 7.65 (s, 1H, N-CH=CH-N), 8.64 – 8.71 (s, 1H, N-CH=N), 8.72 – 8.79 ppm (s, 1H, N-CH=N);  $^{13}C$  NMR (101 MHz, DMSO- $d_6$ )  $\delta$  = 10.98, 23.47, 35.33, 49.96, 119.57, 122.79, 124.00, 125.40 (d,  $J=16.3$ ), 138.70, 139.33 ppm;  $^{11}B$  NMR (193 MHz, DMSO- $d_6$ )  $\delta$  = -9.53 ppm; IR (KBr):  $\tilde{\nu}$ = 3488, 3131, 3077, 2968, 2879, 2429, 2239, 2130, 1546, 1161, 1129  $cm^{-1}$ ; HRMS (ESI)  $m/z$ :  $[M]^+$  calcd for  $C_{10}H_{18}BN_4^+$ : 205.16190, found: 205.16201.  $[M]^-$  calcd for  $C_2N_3^-$ :66.00867,, found66.00884.

### **Synthesis of (1-allyl-1H-imidazol-3-ium-1-yl)(1-methyl-1H-imidazol-3-ium-1-yl) dihydroboronium dicyandiamide (3d)**

The product **3d** was a viscous transparent liquid; yield, 85%.  $^1H$  NMR (400 MHz, DMSO- $d_6$ ) : $\delta$ = 3.73 – 3.80 (s, 3H,  $CH_3$ ), 4.72 – 4.79 (d, 2H,  $CH_2$ ), 5.16 – 5.25 (dd, 1H,CH), 5.25 – 5.33 (dd ,1H,CH), 5.95 – 6.10 (1H, ddt), 7.34 – 7.43 (dt, 2H, N-CH=CH-N), 7.50 – 7.58 (dt, 2H,N-CH=CH-N), 8.67 – 8.72 (s,1H,N-CH=N), 8.73 – 8.78 ppm (s, 1H, N-CH=N);  $^{13}C$  NMR (101 MHz, DMSO- $d_6$ )  $\delta$  = 35.35, 50.57, 119.54, 120.04, 122.87, 124.01, 125.36, 125.63, 132.86, 138.76, 139.40 ppm;  $^{11}B$  NMR (193 MHz, DMSO- $d_6$ )  $\delta$  = -8.68 ppm; IR (KBr):  $\tilde{\nu}$ = 3426, 3129, 2429, 2229, 2136, 1543, 1160, 1126  $cm^{-1}$ ; HRMS (ESI)  $m/z$ :  $[M]^+$  calcd for  $C_{10}H_{16}BN_4^+$ : 203.14625, found: 203.14596.  $[M]^-$  calcd for  $C_2N_3^-$ :66.00867, found 66.00940.

### **Synthesis of (1-butyl-1H-imidazol-3-ium-1-yl)(1-methyl-1H-imidazol-3-ium-1-yl) dihydroboronium dicyandiamide (3e)**

The product **3e** was a viscous transparent liquid; yield, 86%.  $^1H$  NMR (400 MHz, DMSO- $d_6$ ) : $\delta$ = 0.85 – 0.94 (t, 3H,  $CH_3$ ), 1.19 – 1.30 (q, 2H, $CH_2$ ), 1.70 – 1.83 (p, 2H,  $CH_2$ ), 3.74 – 3.83 (s, 3H, $CH_3$ ), 4.06 – 4.14 (t, 2H,  $CH_2$ ), 7.35 – 7.42 (d, 2H, N-

CH=CH-N), 7.51 – 7.56 (s, 1H, N-CH=CH-N), 7.60 – 7.65 (s, 1H, N-CH=CH-N), 8.65 – 8.70 (s, 1H, N-CH=N), 8.73 – 8.78 ppm (s, 1H, N-CH=N);  $^{13}\text{C}$  NMR (101 MHz, DMSO- $d_6$ )  $\delta$  = 13.75, 19.40, 32.02, 35.33, 48.18, 119.56, 122.79, 124.00, 125.33, 125.48, 138.66, 139.33 ppm;  $^{11}\text{B}$  NMR (193 MHz, DMSO- $d_6$ )  $\delta$  = -9.59 ppm; IR (KBr):  $\tilde{\nu}$  = 3487, 3132, 3078, 2961, 2872, 2429, 2232, 2133, 1546, 1162, 1129  $\text{cm}^{-1}$ ; HRMS (ESI)  $m/z$ :  $[\text{M}]^+$  calcd for  $\text{C}_{11}\text{H}_{20}\text{BN}_4^+$ : 219.17755, found: 219.17756.  $[\text{M}]^-$  calcd for  $\text{C}_2\text{N}_3^-$ : 66.00867, found: 66.00926.

#### **Synthesis of (1-ethyl-1H-imidazol-3-ium-1-yl)(1-methyl-1H-imidazol-3-ium-1-yl) cyanoborohydride (4a)**

The product 4a was a viscous transparent liquid; yield 80%.  $^1\text{H}$  NMR (400 MHz, DMSO- $d_6$ ):  $\delta$  = 0.03 – 0.50 (dd, 3H,  $\text{BH}_3$ ), 1.26 – 1.49 (m, 3H,  $\text{CH}_3$ ), 3.77 – 3.80 (s, 3H,  $\text{CH}_3$ ), 4.06 – 4.18 (d, 2H,  $\text{CH}_2$ ), 7.31 – 7.39 (d, 2H, N-CH=CH-N), 7.49 – 7.52 (s, 1H), 7.58 – 7.63 (s, 1H), 8.63 – 8.65 (s, 1H, N-CH=N), 8.70 – 8.73 (s, 1H, N-CH=N).  $^{13}\text{C}$  NMR (101 MHz, DMSO- $d_6$ )  $\delta$  = 15.79, 43.74, 122.48, 123.99, 125.39, 125.49, 139.31. IR (KBr):  $\tilde{\nu}$  = 3428, 3138, 3082, 2982, 2948, 2428, 2322, 2221, 2171, 1609, 1549, 1450, 1262, 1128, 1066  $\text{cm}^{-1}$ . HRMS (ESI)  $m/z$ :  $[\text{M}]^+$  calcd for  $\text{C}_9\text{H}_{18}\text{BN}_4^+$ : 191.14625, found: 191.14601.

#### **Synthesis of (1-methyl-1H-imidazol-3-ium-1-yl)(1-vinyl-1H-imidazol-3-ium-1-yl) cyanoborohydride (4b)**

The product 4b was a viscous transparent liquid; yield 72%.  $^1\text{H}$  NMR (400 MHz, DMSO- $d_6$ ):  $\delta$  = -0.41 – 0.81 (dd, 3H,  $\text{BH}_3$ ), 3.79 – 3.81 (s, 3H,  $\text{CH}_3$ ), 5.24 – 5.37 (d, 1H,  $\text{CH}=\text{CH}_2$ ), 5.83 – 5.97 (d, 1H,  $\text{CH}=\text{CH}_2$ ), 7.20 – 7.29 (dd, 1H,  $\text{CH}=\text{CH}_2$ ), 7.36 – 7.42 (s, 1H, N-CH=CH-N), 7.50 – 7.52 (s, 1H, N-CH=CH-N), 7.52 – 7.55 (s, 1H, N-CH=CH-N), 7.92 – 8.12 (s, 1H, N-CH=CH-N), 8.66 – 8.70 (s, 1H, N-CH=N), 9.01 – 9.06 (s, 1H, N-CH=N).  $^{13}\text{C}$  NMR (101 MHz, DMSO- $d_6$ )  $\delta$  = 35.43, 107.60, 119.58, 124.01, 125.40, 126.27, 129.38, 137.97, 139.46. IR (KBr):  $\tilde{\nu}$  = 3425, 3134, 2432, 2322, 2223, 2167, 1651, 1537, 1423, 1263, 1129, 1006  $\text{cm}^{-1}$ . HRMS (ESI)  $m/z$ :  $[\text{M}]^+$  calcd for  $\text{C}_9\text{H}_{16}\text{BN}_4^+$ : 189.13060, found: 189.13016.

#### **Synthesis of (1-methyl-1H-imidazol-3-ium-1-yl)(1-propyl-1H-imidazol-3-ium-1-yl) cyanoborohydride (4c)**

The product 4c was a viscous transparent liquid; yield 79%. <sup>1</sup>H NMR (400 MHz, DMSO-*d*<sub>6</sub>): δ = -0.19 – 0.57 (m, 3H, BH<sub>3</sub>), 0.81 – 0.85 (td, 3H, CH<sub>3</sub>), 1.76 – 1.82 (q, 2H, CH<sub>2</sub>), 3.78 – 3.80 (m, 3H, CH<sub>3</sub>), 4.05 – 4.08 (m, 2H, CH<sub>2</sub>), 7.36 – 7.37 (s, 1H, N-CH=CH-N), 7.38 – 7.40 (s, 1H, N-CH=CH-N), 7.52 – 7.54 (s, 1H, N-CH=CH-N), 7.59 – 7.65 (s, 1H, N-CH=CH-N), 8.66 – 8.68 (s, 1H, N-CH=N), 8.71 – 8.77 (s, 1H, N-CH=N). <sup>13</sup>C NMR (101 MHz, DMSO-*d*<sub>6</sub>) δ= 10.98, 23.47, 35.38, 49.96, 122.82, 124.03, 125.34, 125.50, 138.70, 139.34. IR (KBr):  $\tilde{\nu}$ = 3410, 3133, 3082, 2967, 2878, 2428, 2331, 2222, 2173, 1611, 1546, 1458, 1263, 1127, 1047 cm<sup>-1</sup>. HRMS (ESI) m/z: [M]<sup>+</sup> calcd for C<sub>10</sub>H<sub>18</sub>BN<sub>4</sub><sup>+</sup>: 205.16190, found: 205.16164.

#### **Synthesis of (1-allyl-1H-imidazol-3-ium-1-yl)(1-methyl-1H-imidazol-3-ium-1-yl) cyanoborohydride (4d)**

The product 4d was a viscous transparent liquid; yield 76%. <sup>1</sup>H NMR (400 MHz, DMSO-*d*<sub>6</sub>): δ= -0.12 – 1.00 (m, 3H, BH<sub>3</sub>), 3.87 (s, 3H, CH<sub>3</sub>), 4.85 (d, 2H, CH<sub>2</sub>), 5.12 – 5.48 (m, 2H, CH<sub>2</sub>=CH-CH<sub>2</sub>), 6.10 (dt, 1H, CH<sub>2</sub>=CH-CH<sub>2</sub>), 7.34 – 7.70 (m, 4H, N-CH=CH-N), 8.66 – 8.89 (m, 2H, N-CH=N). <sup>13</sup>C NMR (101 MHz, DMSO-*d*<sub>6</sub>) δ 35.38, 35.40, 50.60, 120.13, 122.87, 124.01, 125.39, 125.67, 132.80, 138.72, 139.38. IR (KBr):  $\tilde{\nu}$ = 3424, 3136, 2428, 2362, 2172, 1642, 1546, 1424, 1261, 1128, 995 cm<sup>-1</sup>. HRMS (ESI) m/z: [M]<sup>+</sup> calcd for C<sub>10</sub>H<sub>16</sub>BN<sub>4</sub><sup>+</sup>: 203.14625, found: 203.14606.

#### **Synthesis of (1-butyl-1H-imidazol-3-ium-1-yl)(1-methyl-1H-imidazol-3-ium-1-yl) cyanoborohydride (4e)**

The product 4e was a viscous transparent liquid; yield 80%. <sup>1</sup>H NMR (400 MHz, DMSO-*d*<sub>6</sub>): δ= 0.01 – 0.51 (m, 3H, BH<sub>3</sub>), 0.88 (td, 3H, CH<sub>3</sub>), 1.23 (q, 2H, CH<sub>2</sub>), 1.76 (p, 2H, CH<sub>2</sub>), 3.80 (s, 3H, CH<sub>3</sub>), 4.10 (dt, 2H, CH<sub>2</sub>), 7.37 (d, 2H, N-CH=CH-N), 7.52 (s, 1H, N-CH=CH-N), 7.61 (s, 1H, N-CH=CH-N), 8.65 (s, 1H, N-CH=N), 8.73 (s, 1H, N-CH=N). <sup>13</sup>C NMR (101 MHz, DMSO-*d*<sub>6</sub>) δ 13.73, 19.39, 32.03, 35.36, 40.54, 48.21, 122.80, 124.01, 125.35, 125.49, 138.65, 139.33. IR (KBr):  $\tilde{\nu}$ = 3415, 3133, 3078, 2967, 2878, 2429, 2330, 2172, 1612, 1546, 1458, 1263, 1161, 1128, 1048 cm<sup>-1</sup>. HRMS (ESI) m/z: [M]<sup>+</sup> calcd for C<sub>11</sub>H<sub>20</sub>BN<sub>4</sub><sup>+</sup>: 219.17755, found: 219.17731.



## 2 .NMR and HRMS-ESI Spectra

### $^1\text{H}$ NMR $^{13}\text{C}$ NMR $^{11}\text{B}$ NMR spectra and HRMS of the ionic liquids

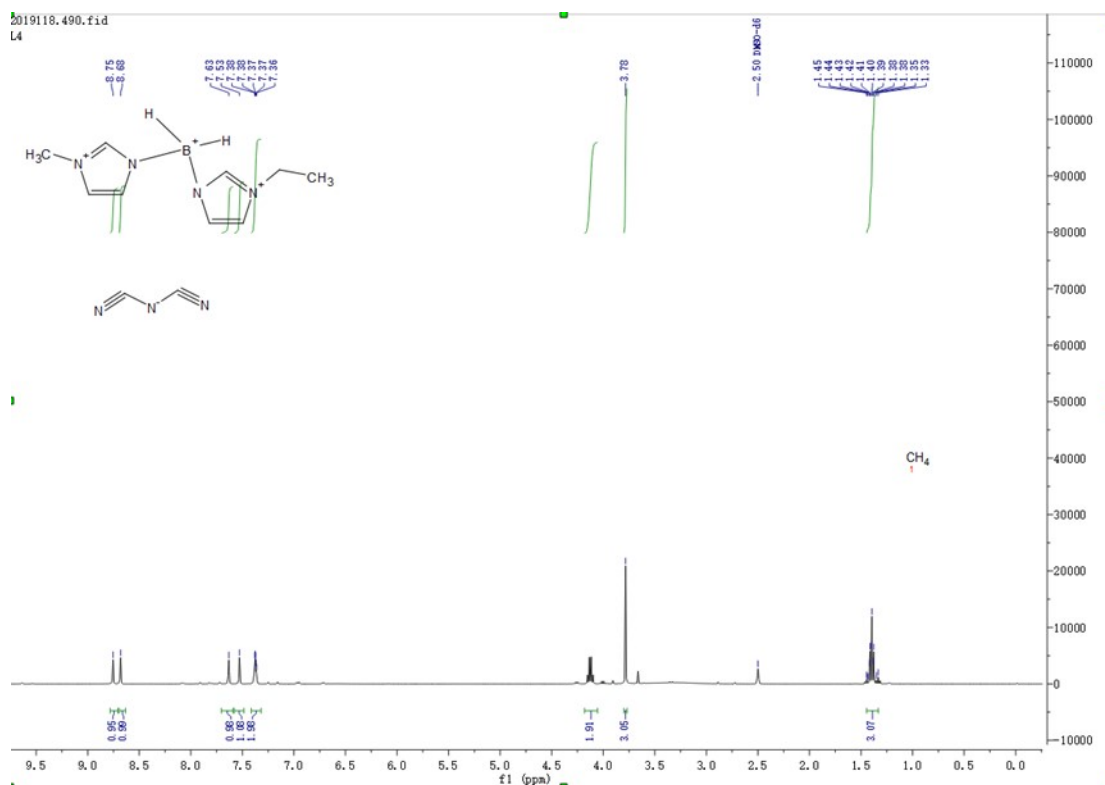

**Figure S2**  $^1\text{H}$ NMR (400 MHz) of (1-ethyl-1H-imidazol-3-ium-1-yl)(1-methyl-1H-imidazol-3-ium-1-yl) dihydroboronium dicyandiamide in  $\text{DMSO-}D_6$ .

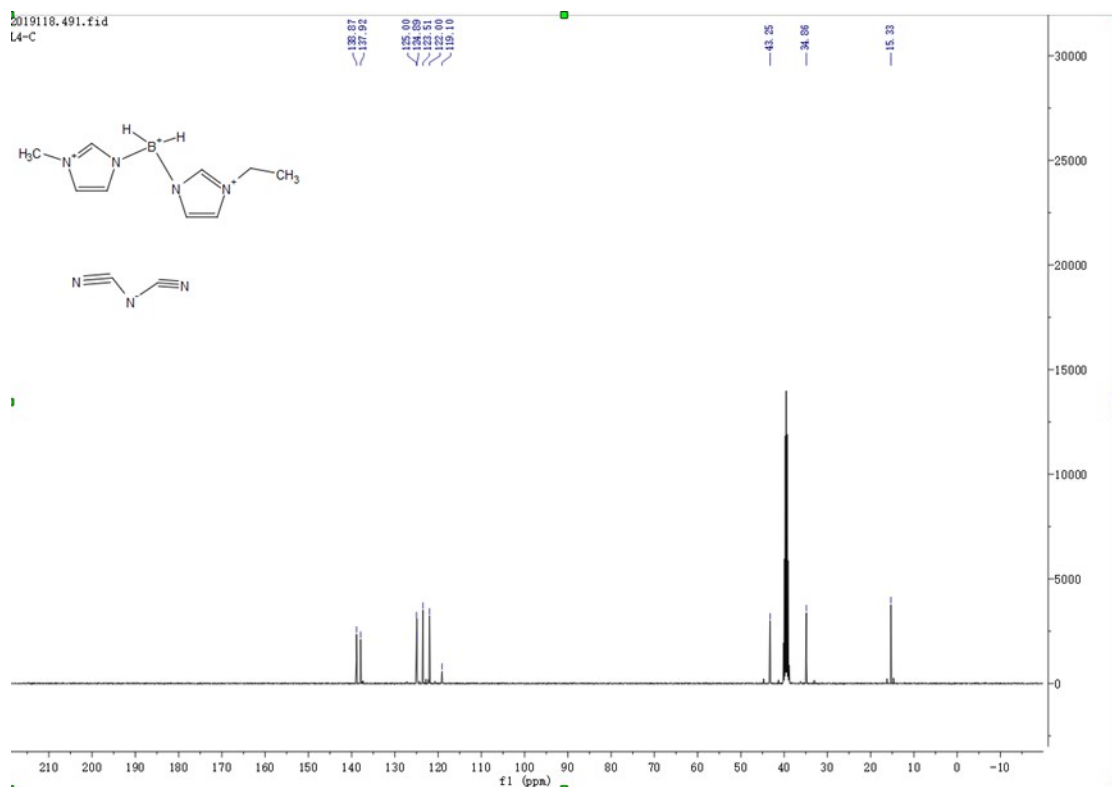

**Figure S3** <sup>13</sup>CNMR (101 MHz) of (1-ethyl-1H-imidazol-3-ium-1-yl)(1-methyl-1H-imidazol-3-ium-1-yl) dihydroboronium dicyandiamide in DMSO-D<sub>6</sub>.

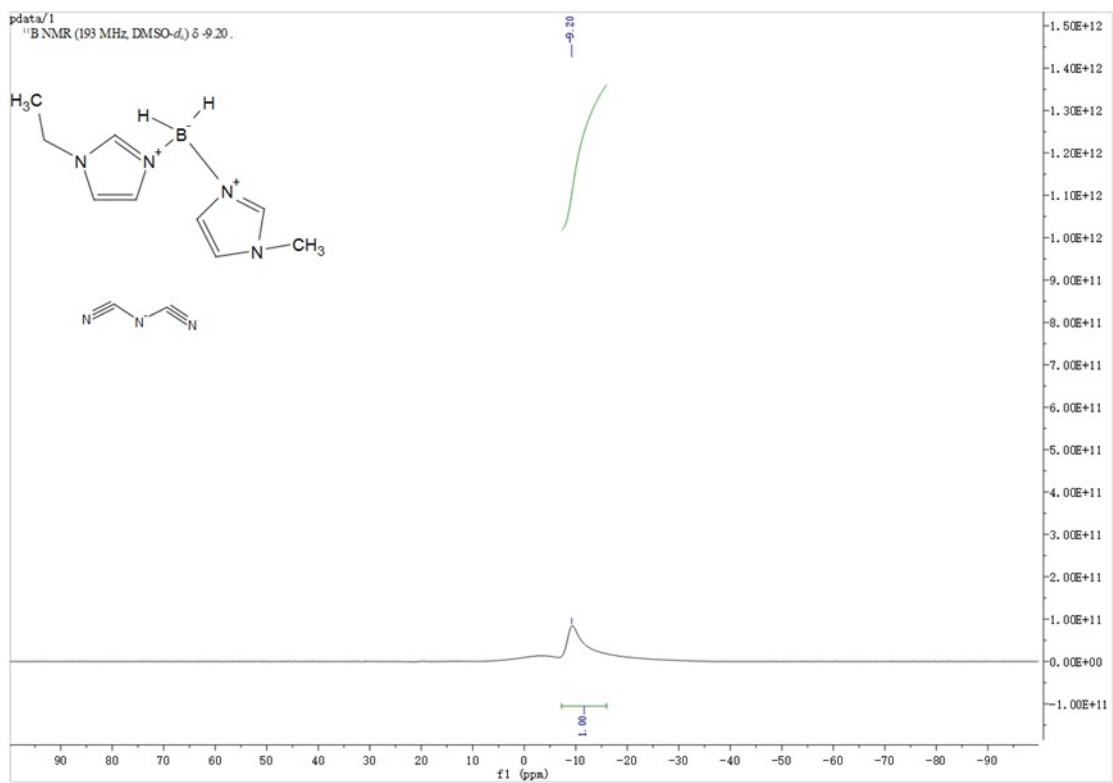

**Figure S4** <sup>11</sup>B NMR (193 MHz) of (1-ethyl-1H-imidazol-3-ium-1-yl)(1-methyl-1H-imidazol-3-ium-1-yl) dihydroboronium dicyandiamide in DMSO-D<sub>6</sub>.

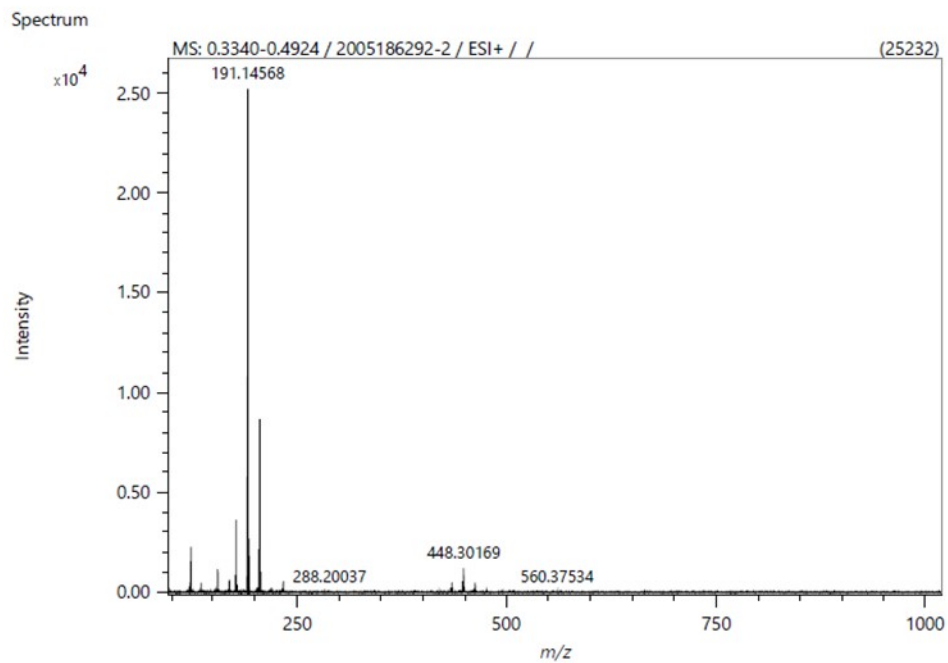

**Figure S5** HRMS-ESI spectrum of (1-ethyl-1H-imidazol-3-ium-1-yl)(1-methyl-1H-imidazol-3-ium-1-yl) dihydroboronium dicyandiamide (positive) solvent ( $\text{CH}_2\text{Cl}_2$ ) .

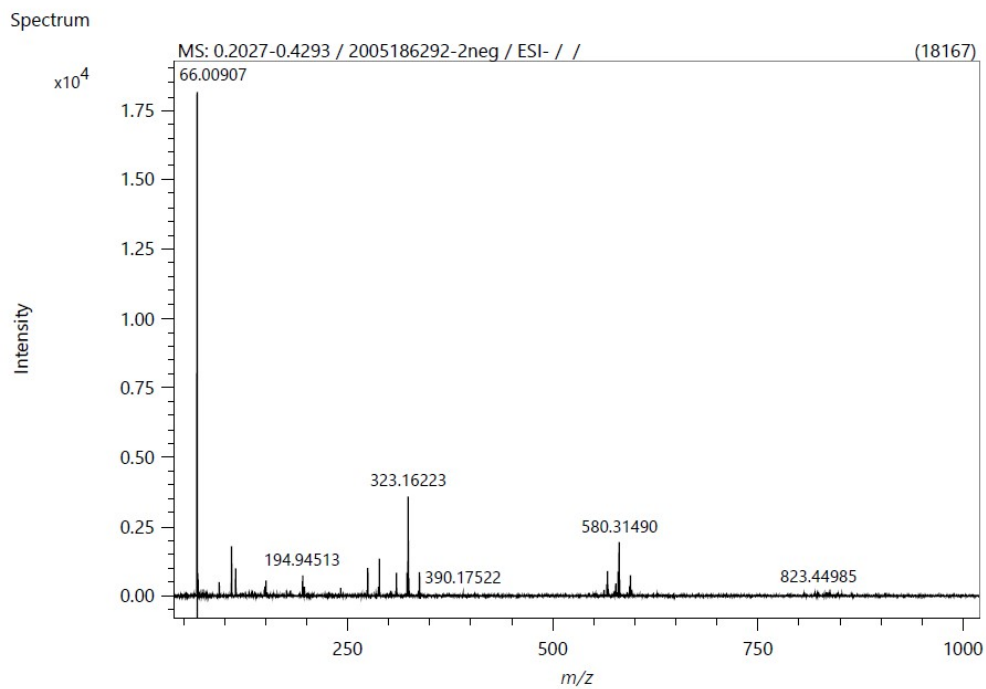

**Figure S6** HRMS-ESI spectrum of (1-ethyl-1H-imidazol-3-ium-1-yl)(1-methyl-1H-imidazol-3-ium-1-yl) dihydroboronium dicyandiamide (negative) solvent ( $\text{CH}_2\text{Cl}_2$ ).

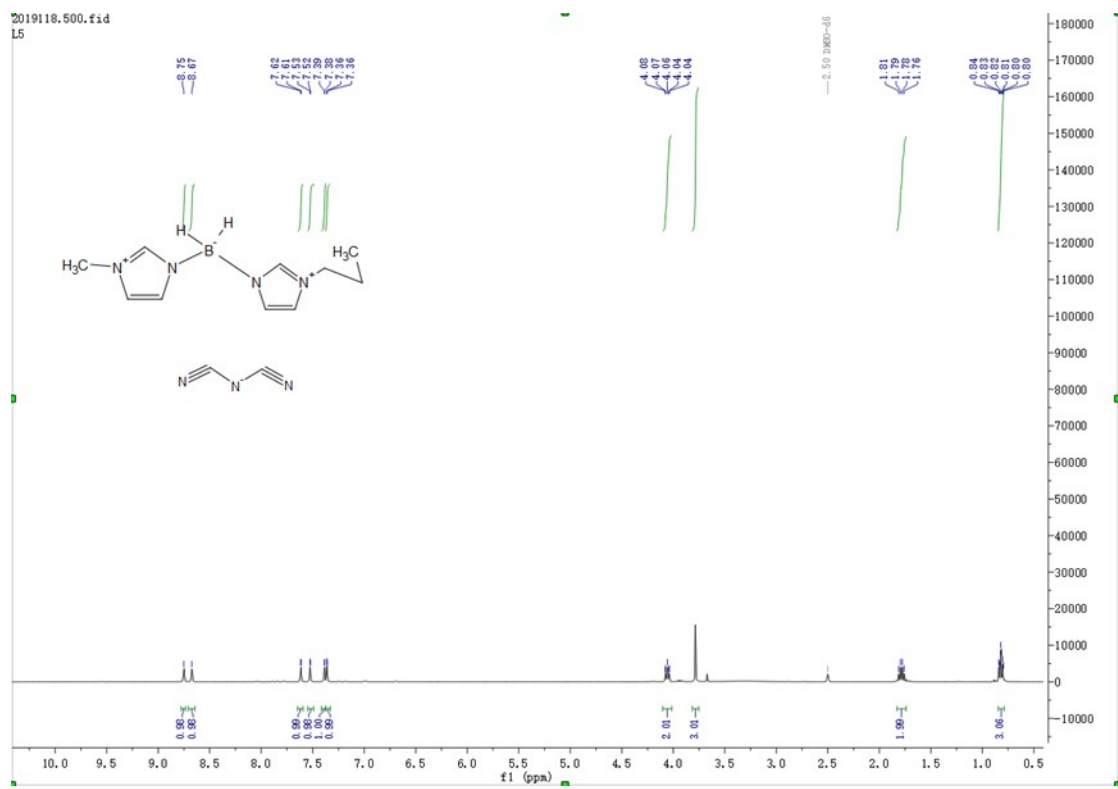

**Figure S7** <sup>1</sup>H NMR (400 MHz) of (1-propyl-1H-imidazol-3-ium-1-yl)(1-methyl-1H-imidazol-3-ium-1-yl) dihydroboronium dicyandiamide in DMSO-D<sub>6</sub>.

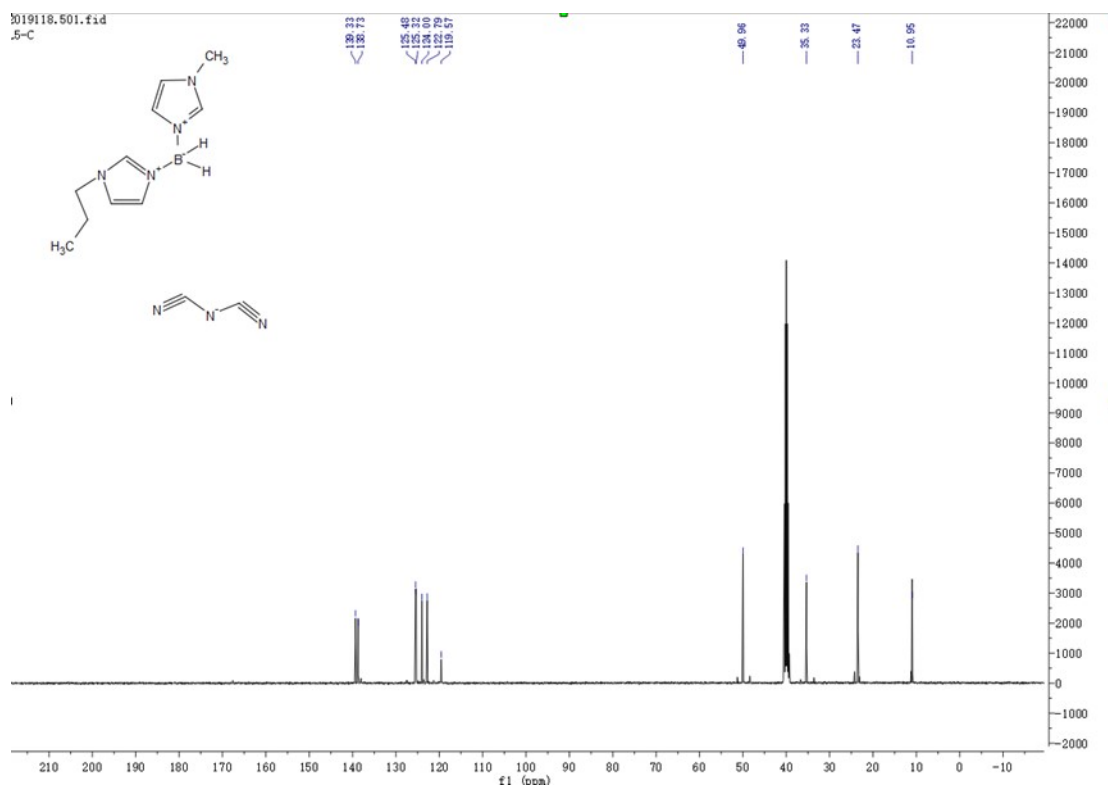

**Figure S8**  $^{13}\text{C}$ NMR (101 MHz) of (1-propyl-1H-imidazol-3-ium-1-yl)(1-methyl-1H-imidazol-3-ium-1-yl) dihydroboronium dicyandiamide in  $\text{DMSO-D}_6$ .

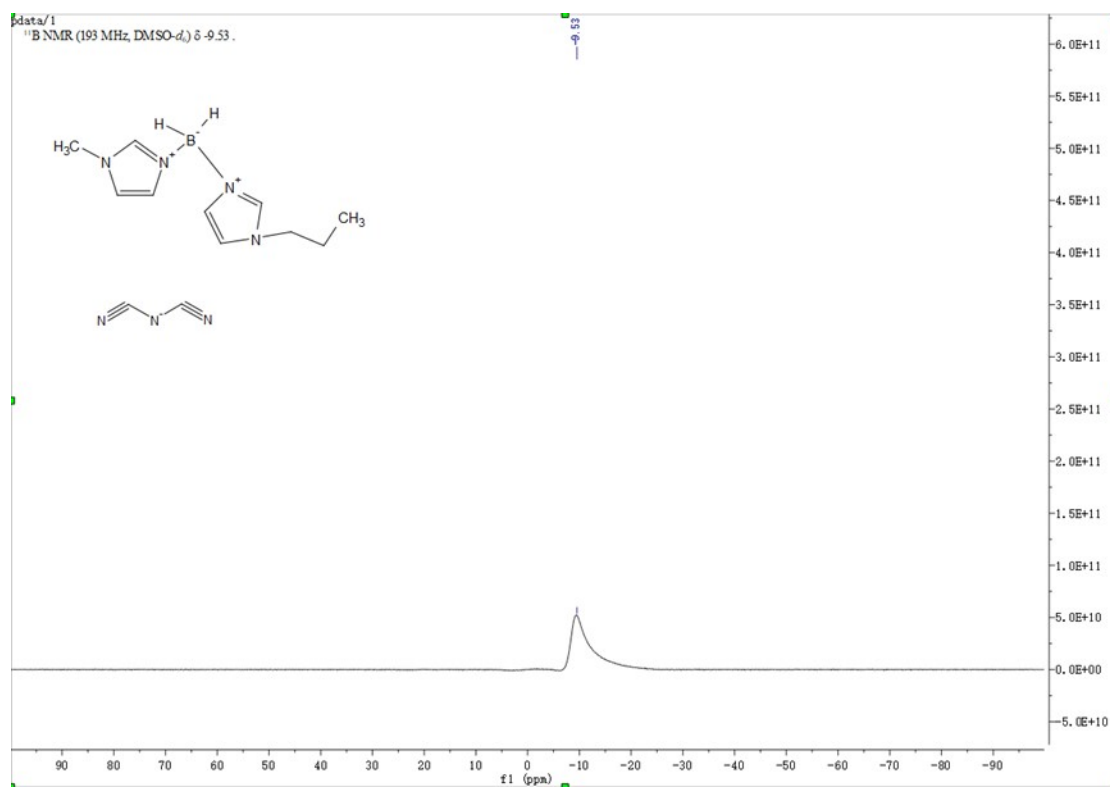

**Figure S9** <sup>11</sup>B NMR (193 MHz) of (1-propyl-1H-imidazol-3-ium-1-yl)(1-methyl-1H-imidazol-3-ium-1-yl) dihydroboronium dicyandiamide in DMSO-D<sub>6</sub>.



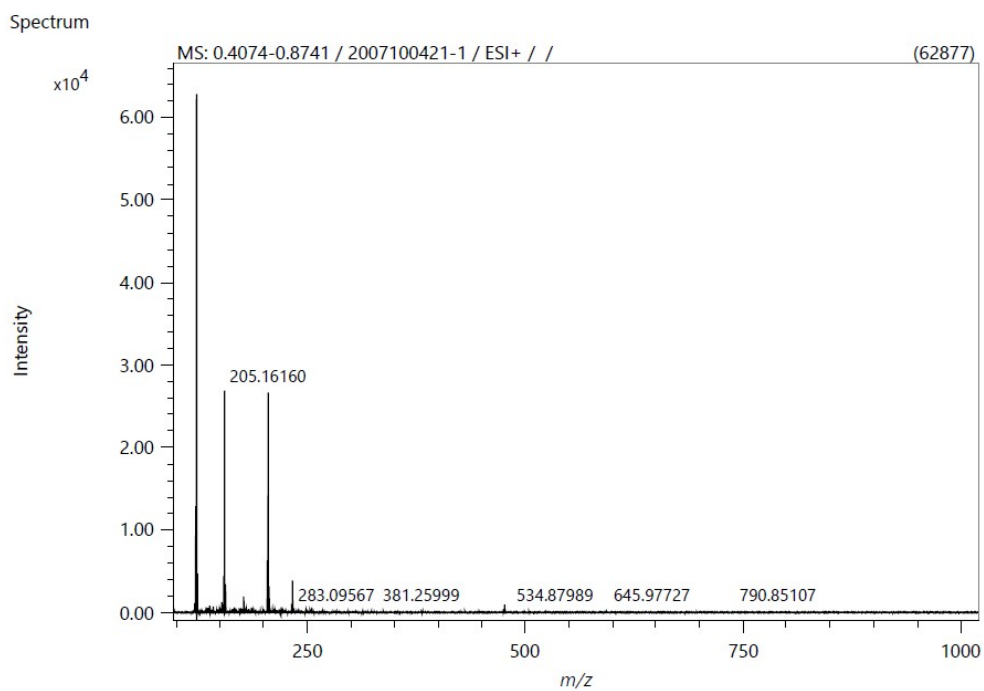

**Figure S10** HRMS-ESI spectrum of (1-propyl-1H-imidazol-3-ium-1-yl)(1-methyl-1H-imidazol-3-ium-1-yl) dihydroboronium dicyandiamide (positive) solvent ( $\text{CH}_2\text{Cl}_2$ ).

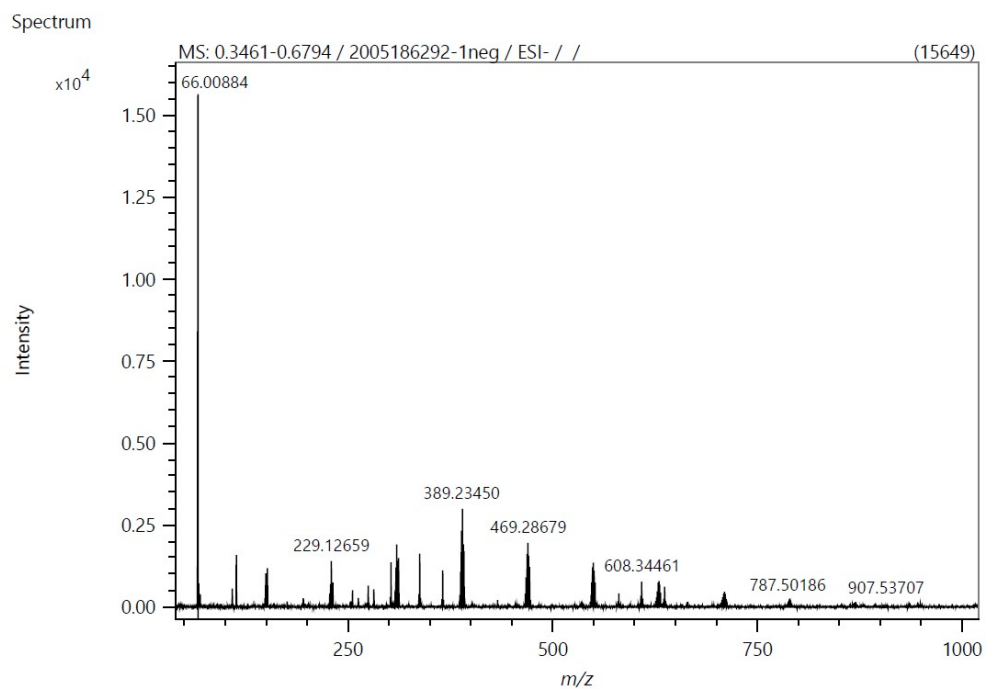

**Figure S11** HRMS-ESI spectrum of (1-propyl-1H-imidazol-3-ium-1-yl)(1-methyl-1H-imidazol-3-ium-1-yl) dihydroboronium dicyandiamide (negative) solvent ( $\text{CH}_2\text{Cl}_2$ ).

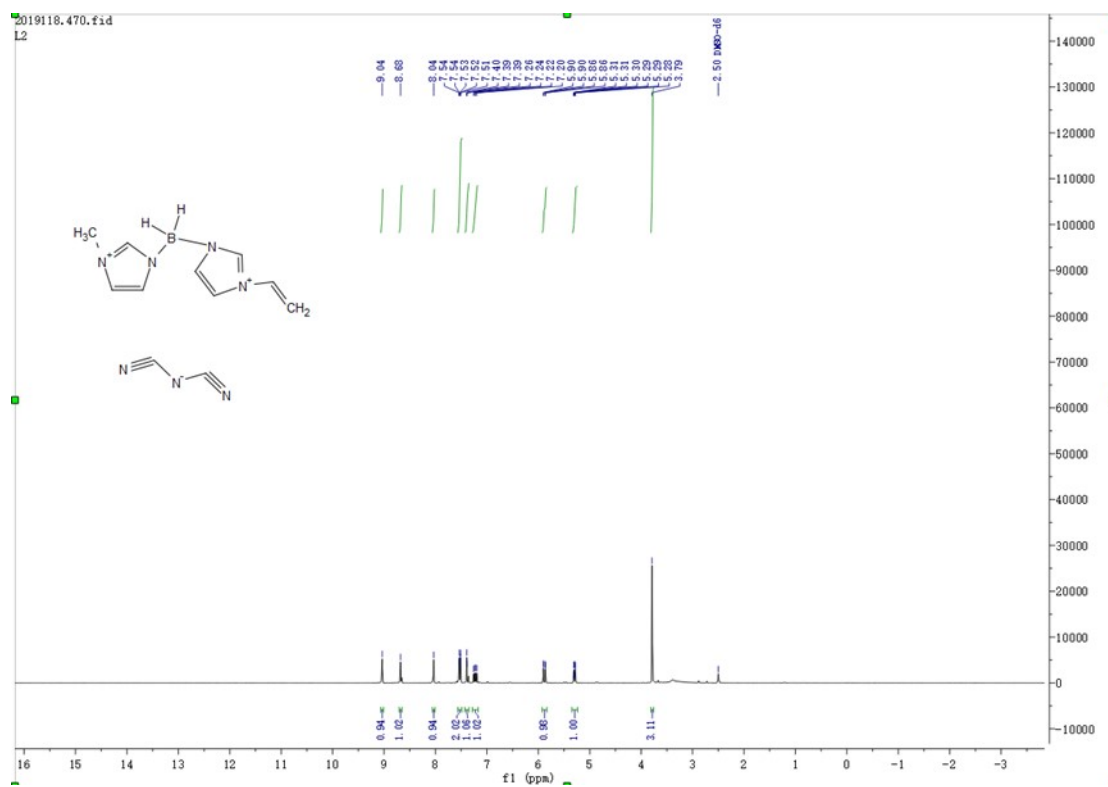

**Figure S12**  $^1\text{H}$ NMR (400 MHz) of (1-vinyl-1H-imidazol-3-ium-1-yl)(1-methyl-1H-imidazol-3-ium-1-yl) dihydroboronium dicyandiamide in DMSO- $\text{D}_6$ .

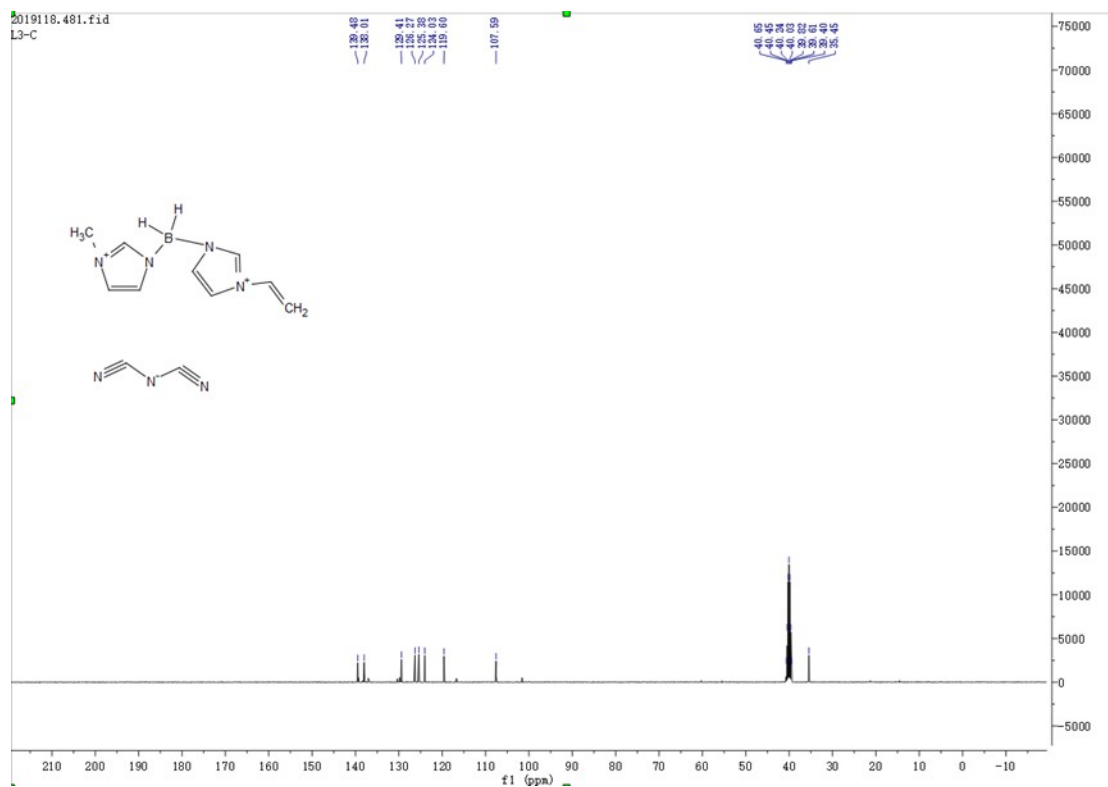

**Figure S13**  $^{13}\text{C}$ NMR (101 MHz) of (1-vinyl-1H-imidazol-3-ium-1-yl)(1-methyl-1H-imidazol-3-ium-1-yl) dihydroboronium dicyandiamide in  $\text{DMSO-D}_6$ .

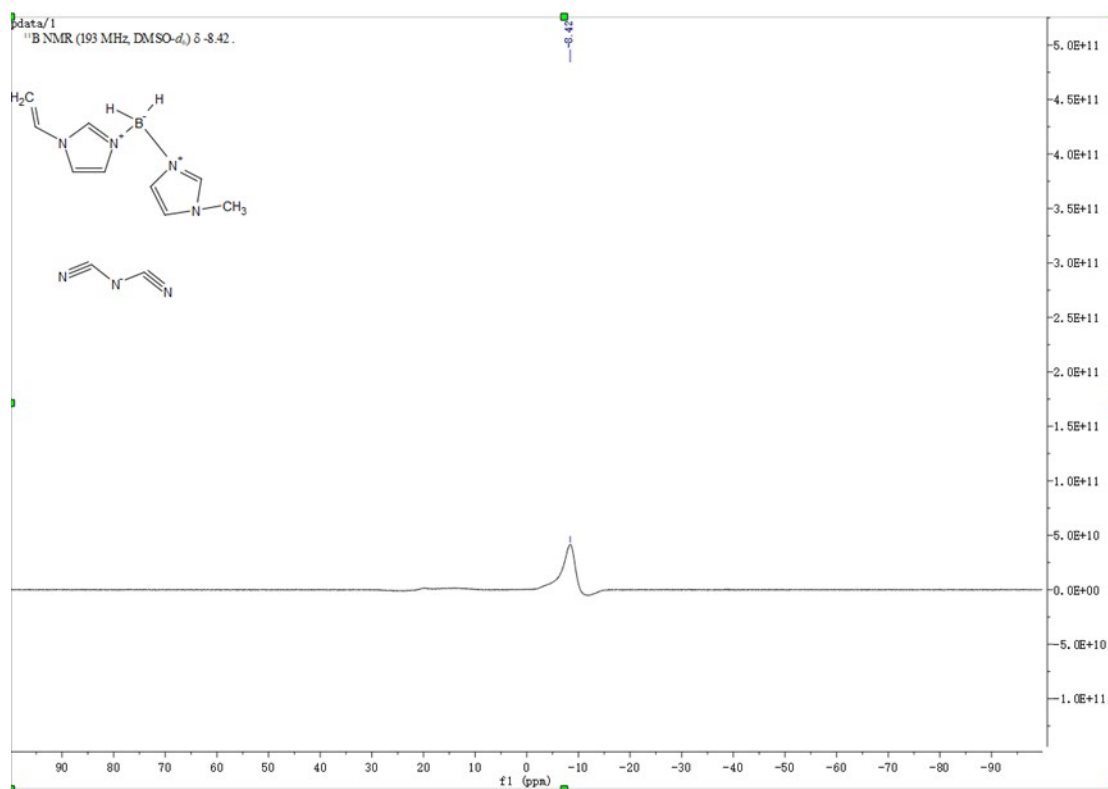

**Figure S14** <sup>11</sup>B NMR (193 MHz) of (1-vinyl-1H-imidazol-3-ium-1-yl)(1-methyl-1H-imidazol-3-ium-1-yl) dihydroboronium dicyandiamide in DMSO-D<sub>6</sub>.

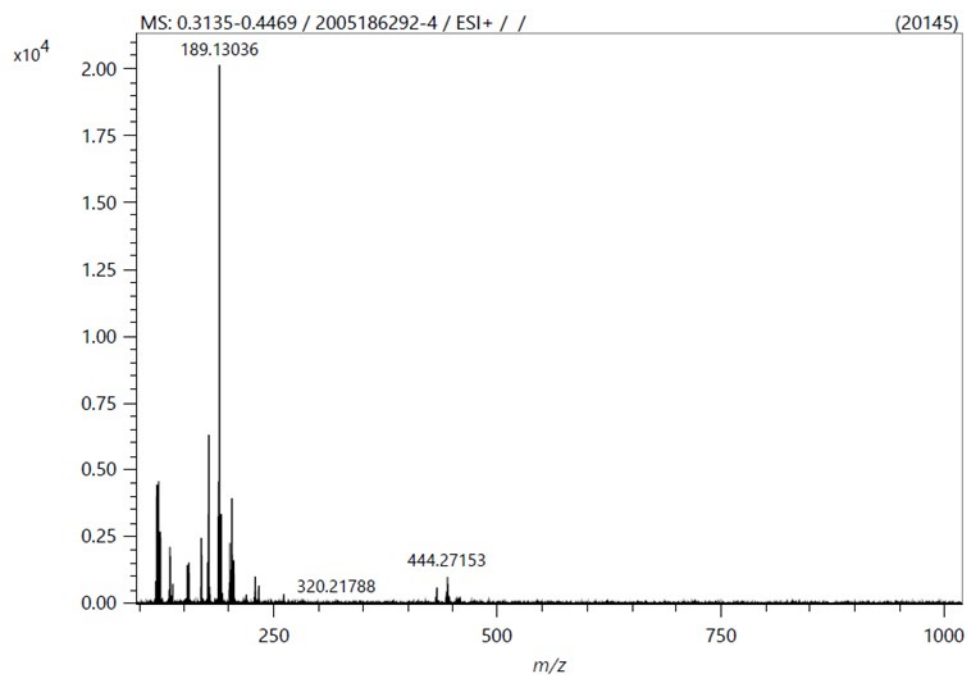

**Figure S15** HRMS-ESI SPECTRUM of (1-vinyl-1H-imidazol-3-ium-1-yl)(1-methyl-1H-imidazol-3-ium-1-yl) dihydroboronium dicyandiamide (positive) solvent (CH<sub>2</sub>Cl<sub>2</sub>).

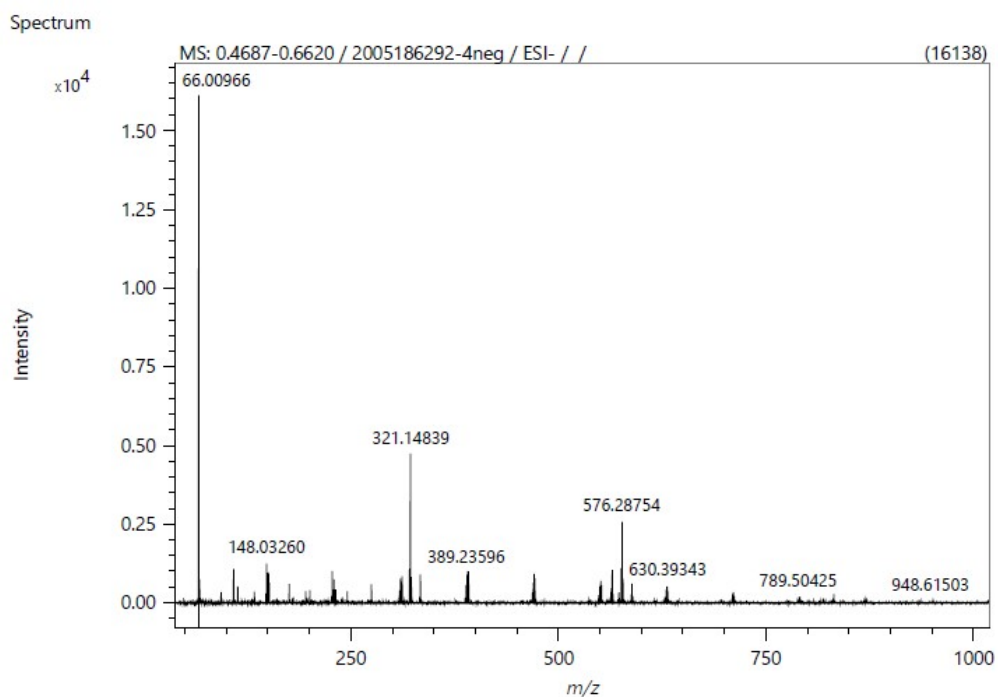

**Figure S16** HRMS-ESI SPECTRUM of (1-vinyl-1H-imidazol-3-ium-1-yl)(1-methyl-1H-imidazol-3-ium-1-yl) dihydroboronium dicyandiamide (negative) solvent ( $\text{CH}_2\text{Cl}_2$ ).





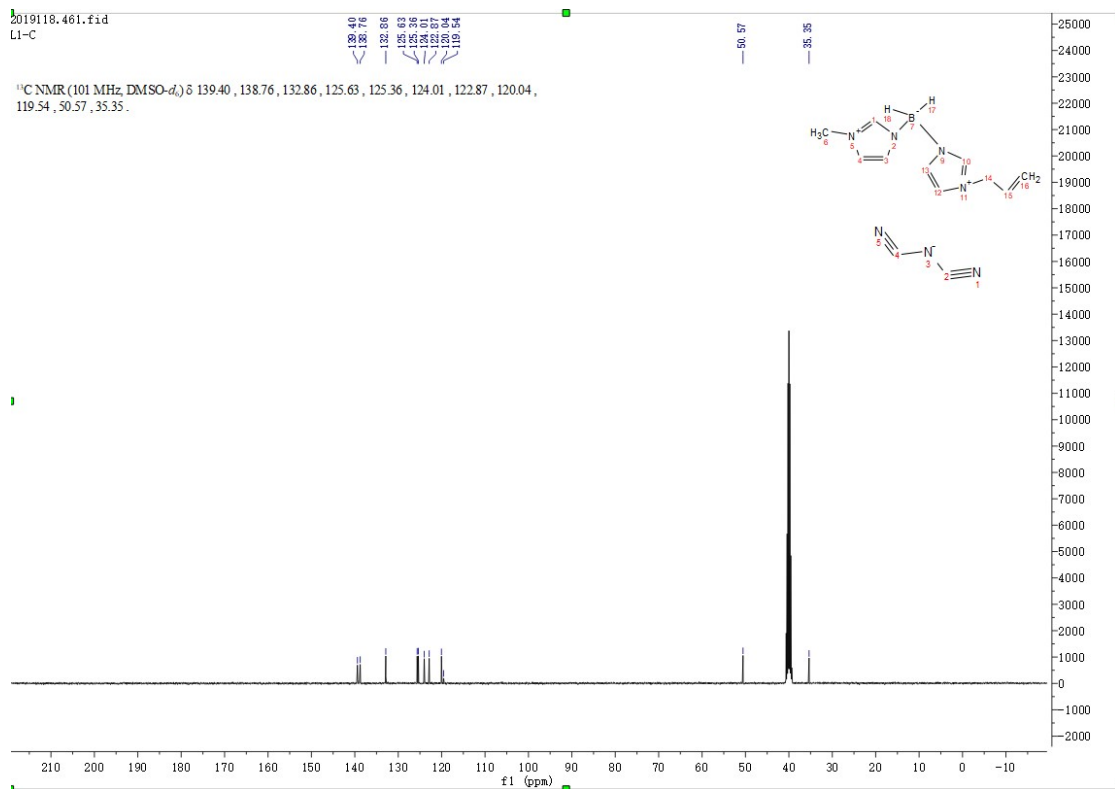

**Figure S18**  $^{13}\text{C}$ NMR (101 MHz) of (1-allyl-1H-imidazol-3-ium-1-yl)(1-methyl-1H-imidazol-3-ium-1-yl) dihydroboronium dicyandiamide in DMSO- $\text{D}_6$ .

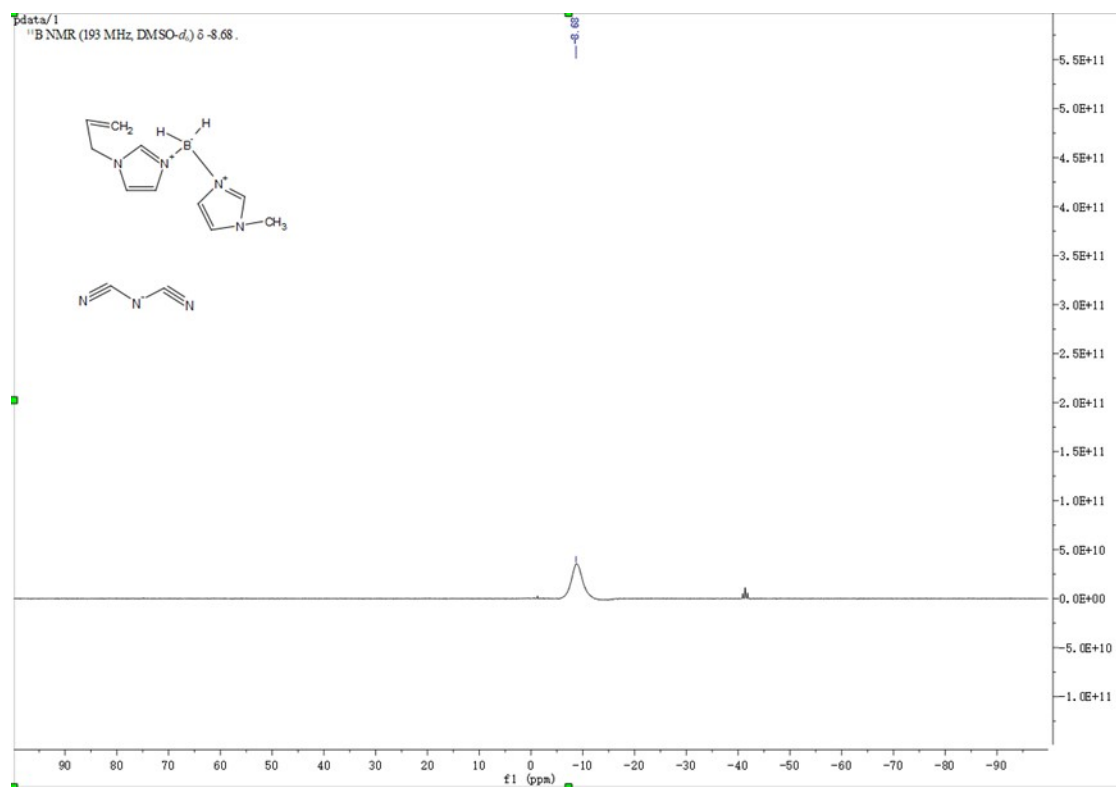

**Figure S19** <sup>11</sup>B NMR (193 MHz) of (1-allyl-1H-imidazol-3-ium-1-yl)(1-methyl-1H-imidazol-3-ium-1-yl) dihydroboronium dicyandiamide in DMSO-D<sub>6</sub>.

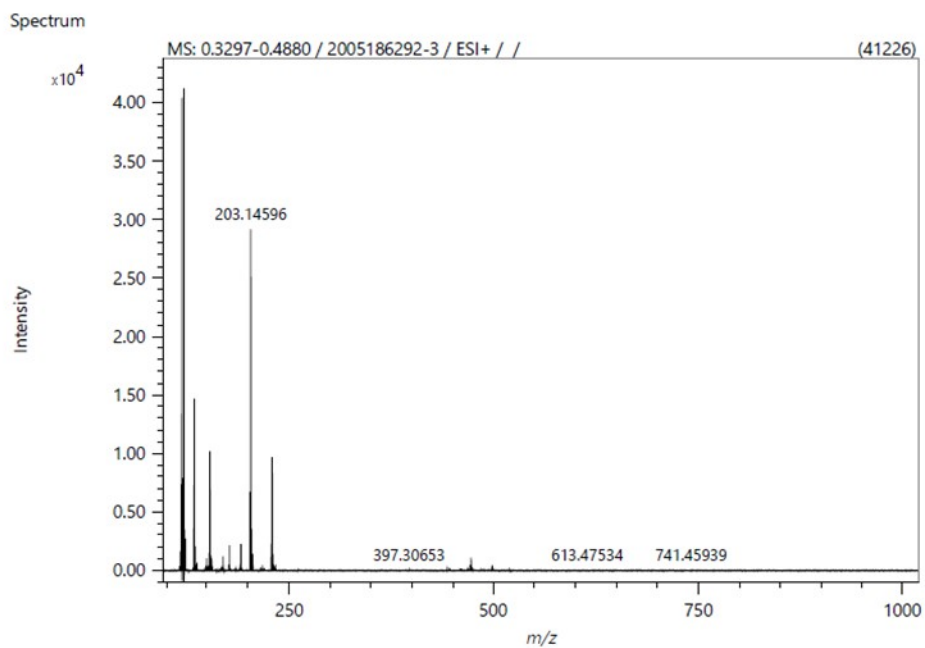

**Figure S20** HRMS-ESI SPECTRUM of (1-allyl-1H-imidazol-3-ium-1-yl)(1-methyl-1H-imidazol-3-ium-1-yl) dihydroboronium dicyandiamide (positive) solvent ( $\text{CH}_2\text{Cl}_2$ ).

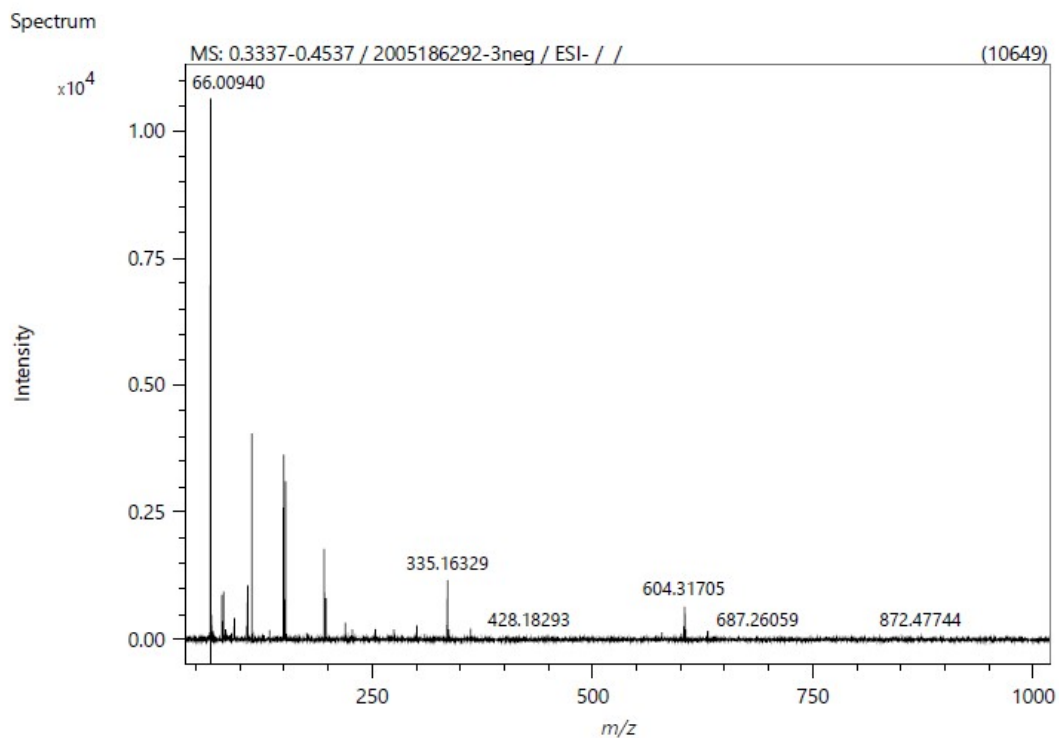

**Figure S21** HRMS-ESI SPECTRUM of (1-allyl-1H-imidazol-3-ium-1-yl)(1-methyl-1H-imidazol-3-ium-1-yl) dihydroboronium dicyandiamide (negative) solvent ( $\text{CH}_2\text{Cl}_2$ ).

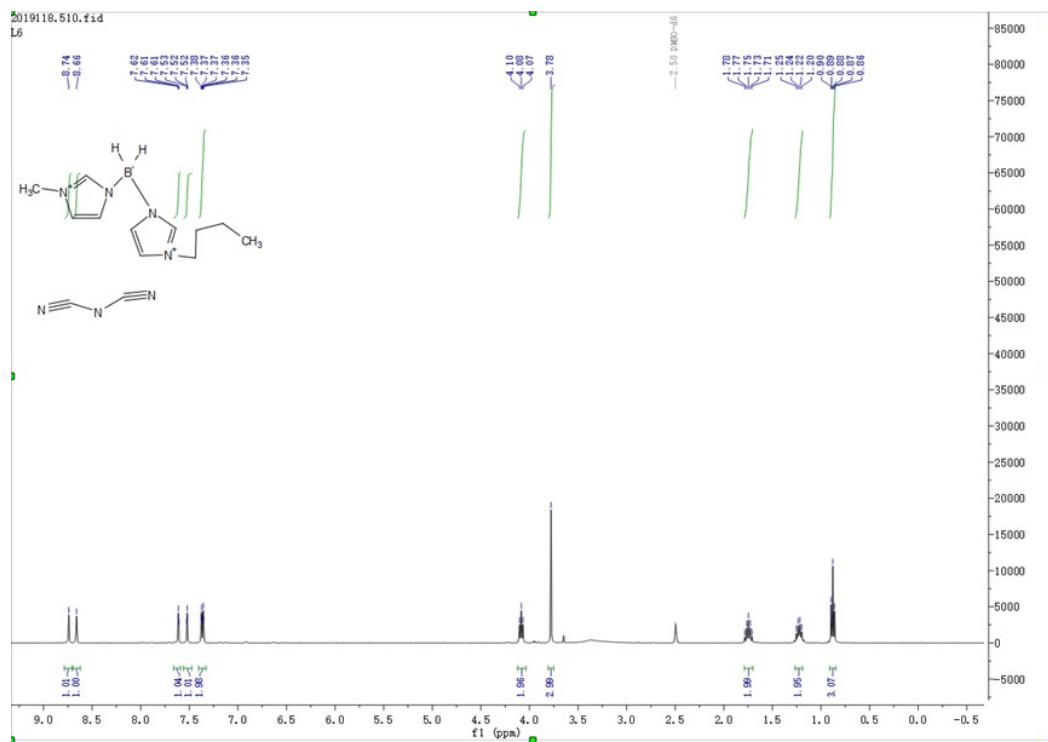

**Figure S22**  $^1\text{H NMR}$  (400 MHz) of (1-butyl-1H-imidazol-3-ium-1-yl)(1-methyl-1H-imidazol-3-ium-1-yl) dihydroboronium dicyandiamide in  $\text{DMSO-D}_6$ .

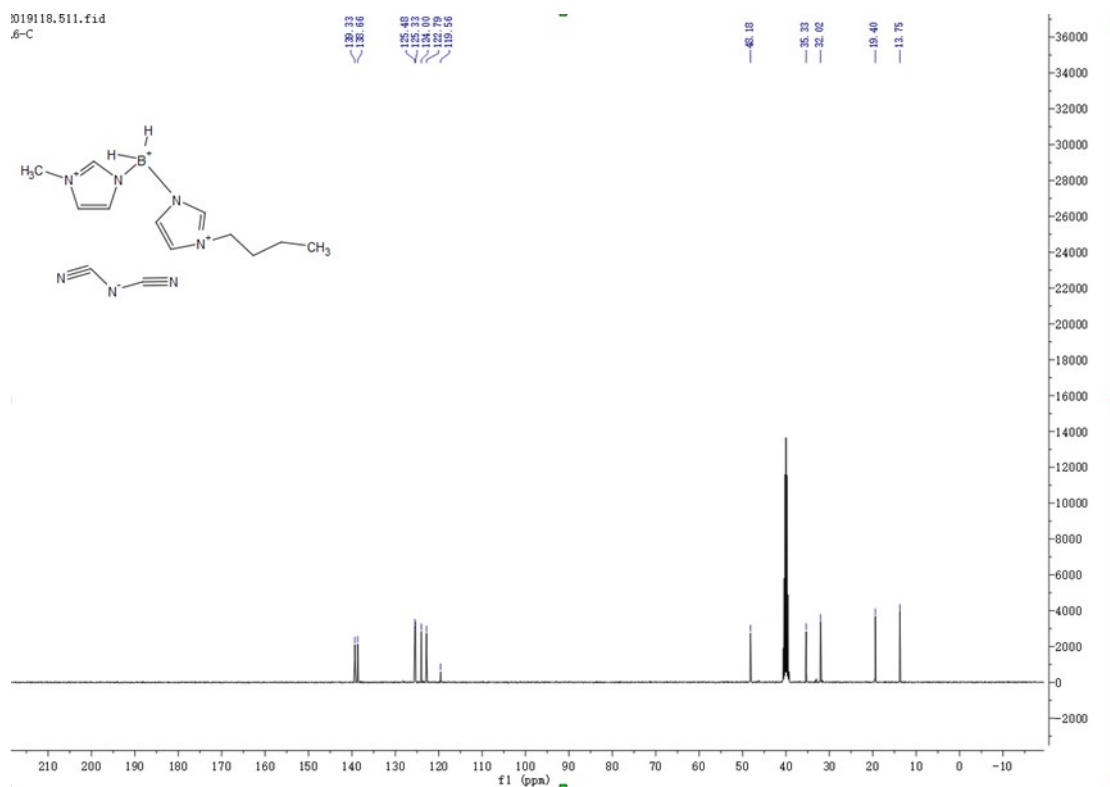

**Figure S23**  $^{13}\text{C}$ NMR (101 MHz) of (1-butyl-1H-imidazol-3-ium-1-yl)(1-methyl-1H-imidazol-3-ium-1-yl) dihydroboronium dicyandiamide in  $\text{DMSO-D}_6$ .

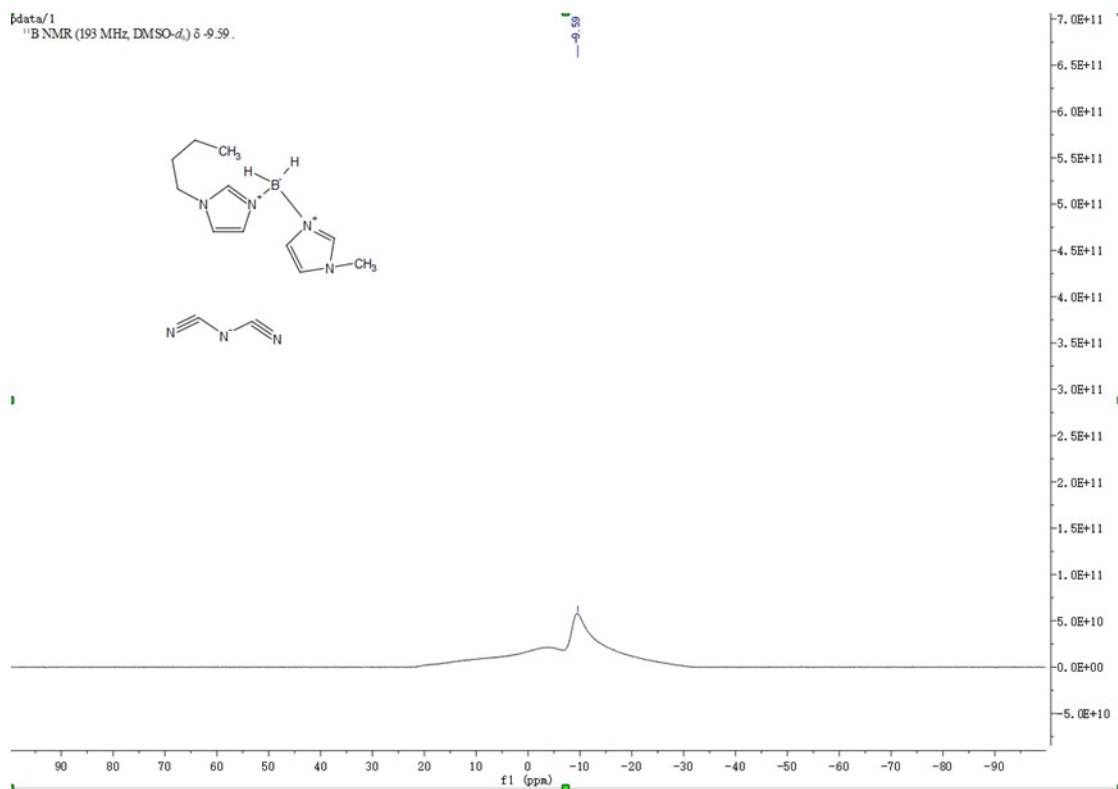

**Figure S24** <sup>11</sup>B NMR (193 MHz) of (1-butyl-1H-imidazol-3-ium-1-yl)(1-methyl-1H-imidazol-3-ium-1-yl) dihydroboronium dicyandiamide in DMSO-D<sub>6</sub>.

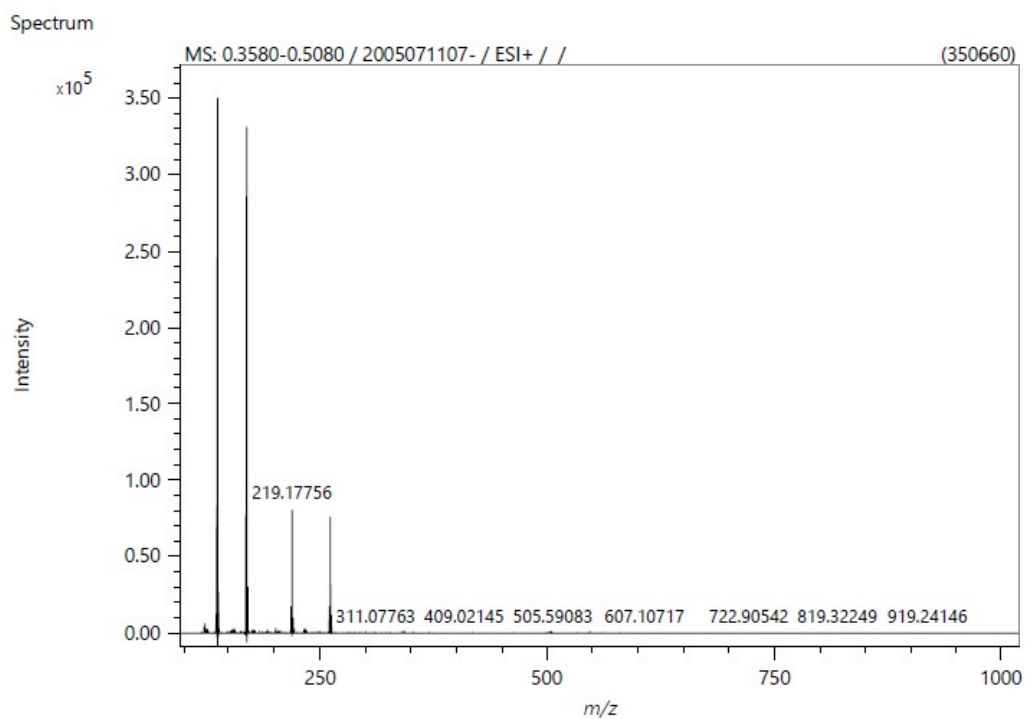

**Figure S25** HRMS-ESI SPECTRUM of (1-butyl-1H-imidazol-3-ium-1-yl)(1-methyl-1H-imidazol-3-ium-1-yl) dihydroboronium dicyandiamide (positive) solvent ( $\text{CH}_2\text{Cl}_2$ ).



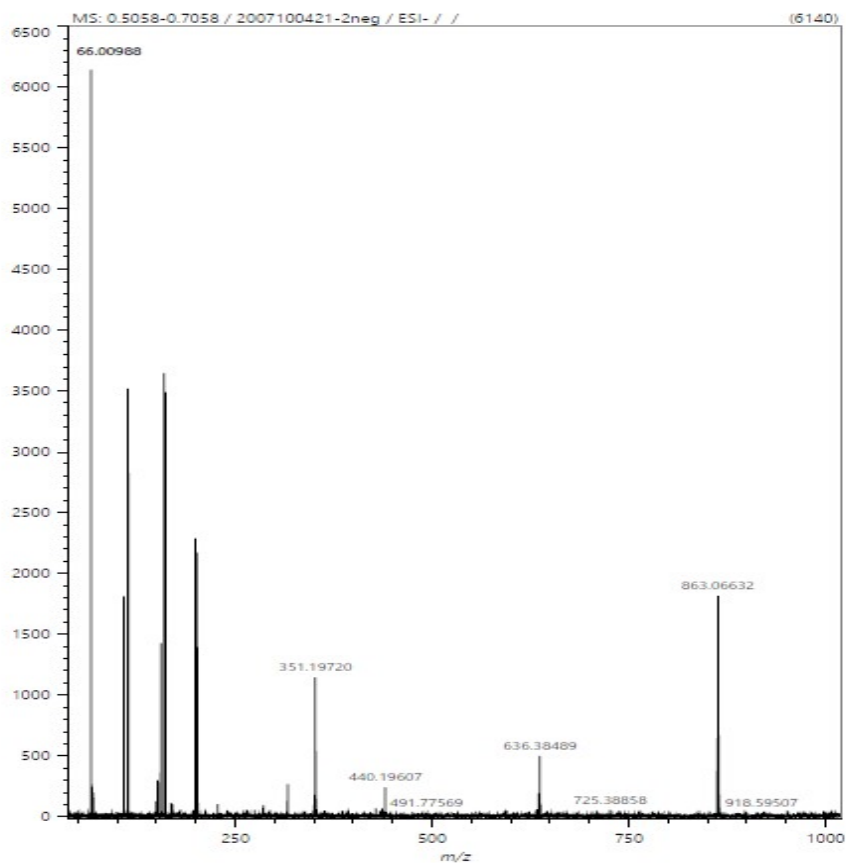

**Figure S26** HRMS-ESI SPECTRUM of (1-butyl-1H-imidazol-3-ium-1-yl)(1-methyl-1H-imidazol-3-ium-1-yl) dihydroboronium dicyandiamide (negative) solvent (CH<sub>2</sub>Cl<sub>2</sub>).

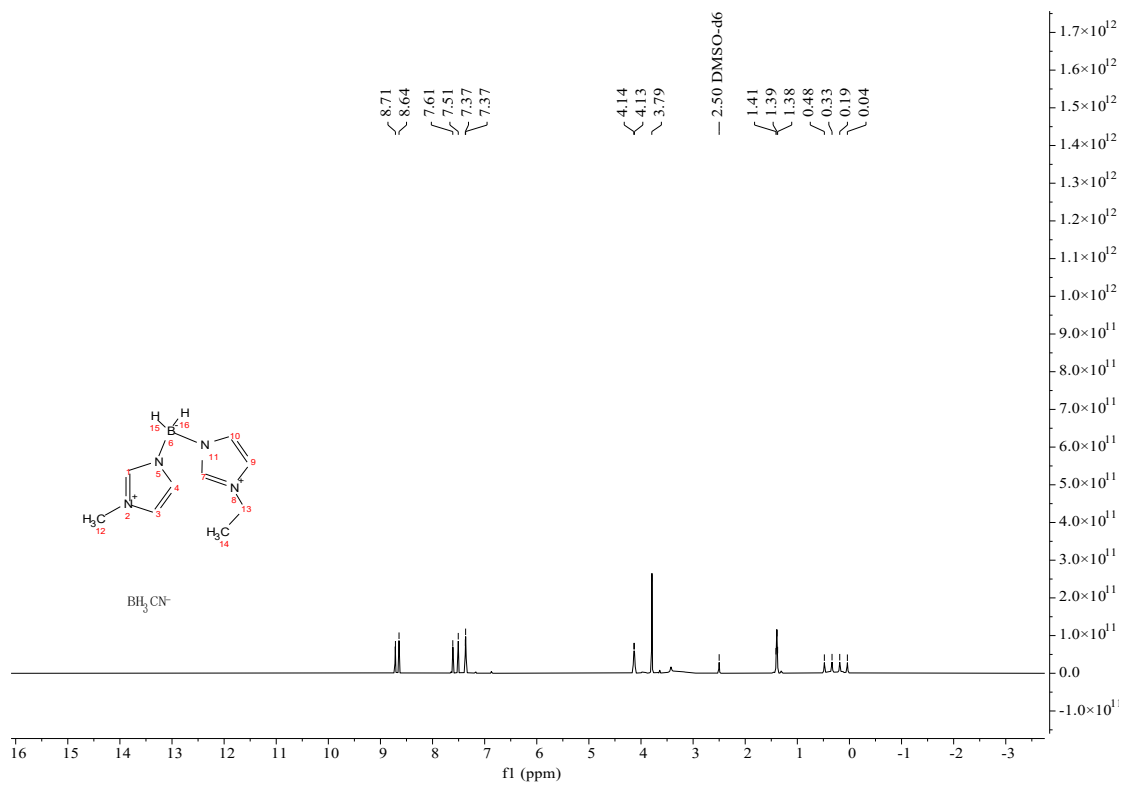

**Figure S27** <sup>1</sup>H NMR (400 MHz) of (1-ethyl-1H-imidazol-3-ium-1-yl)(1-methyl-1H-imidazol-3-ium-1-yl) dihydroboronium cyanoborohydride in DMSO-D<sub>6</sub>.

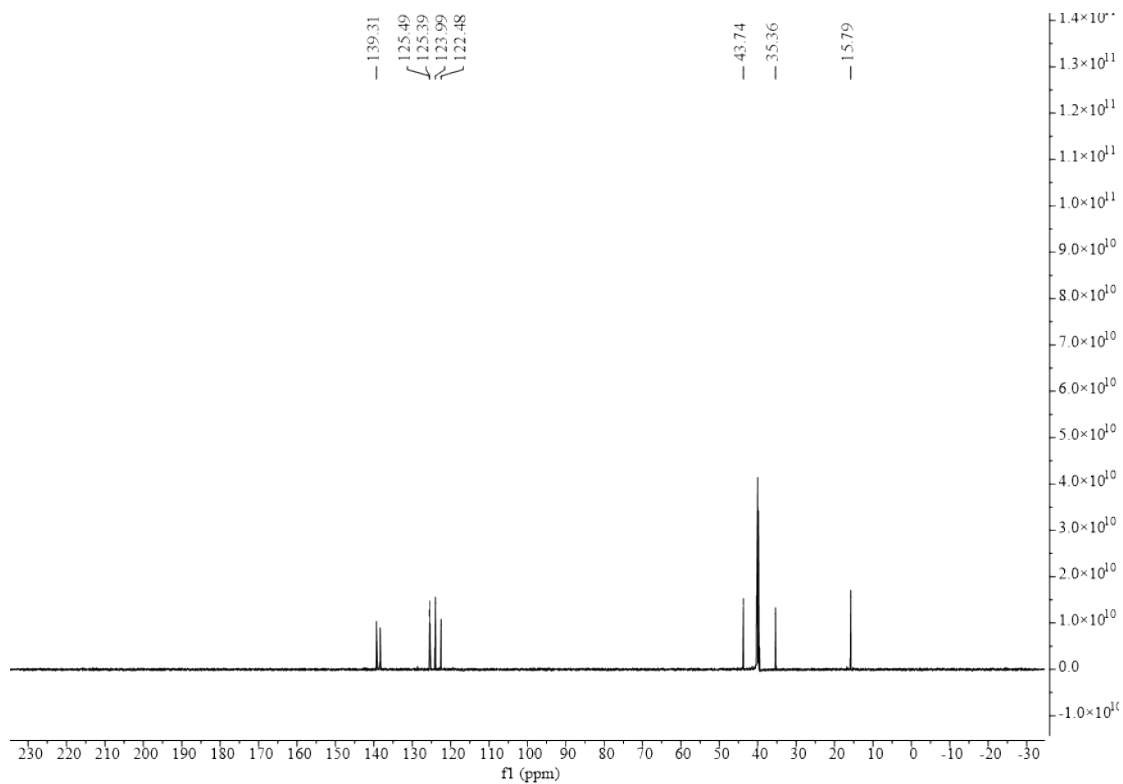

**Figure S28**  $^{13}\text{C}$ NMR (101 MHz) of (1-ethyl-1H-imidazol-3-ium-1-yl)(1-methyl-1H-imidazol-3-ium-1-yl) dihydroboronium cyanoborohydride in  $\text{DMSO-D}_6$ .

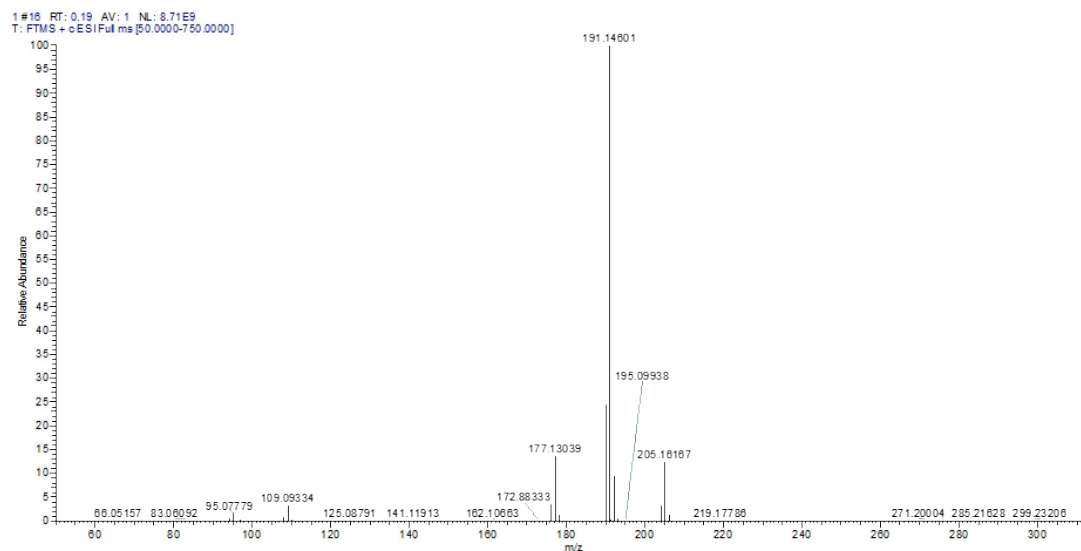

**Figure S29** HRMS-ESI spectrum of (1-ethyl-1H-imidazol-3-ium-1-yl)(1-methyl-1H-imidazol-3-ium-1-yl) dihydroboronium cyanoborohydride (positive) solvent (H<sub>2</sub>O).

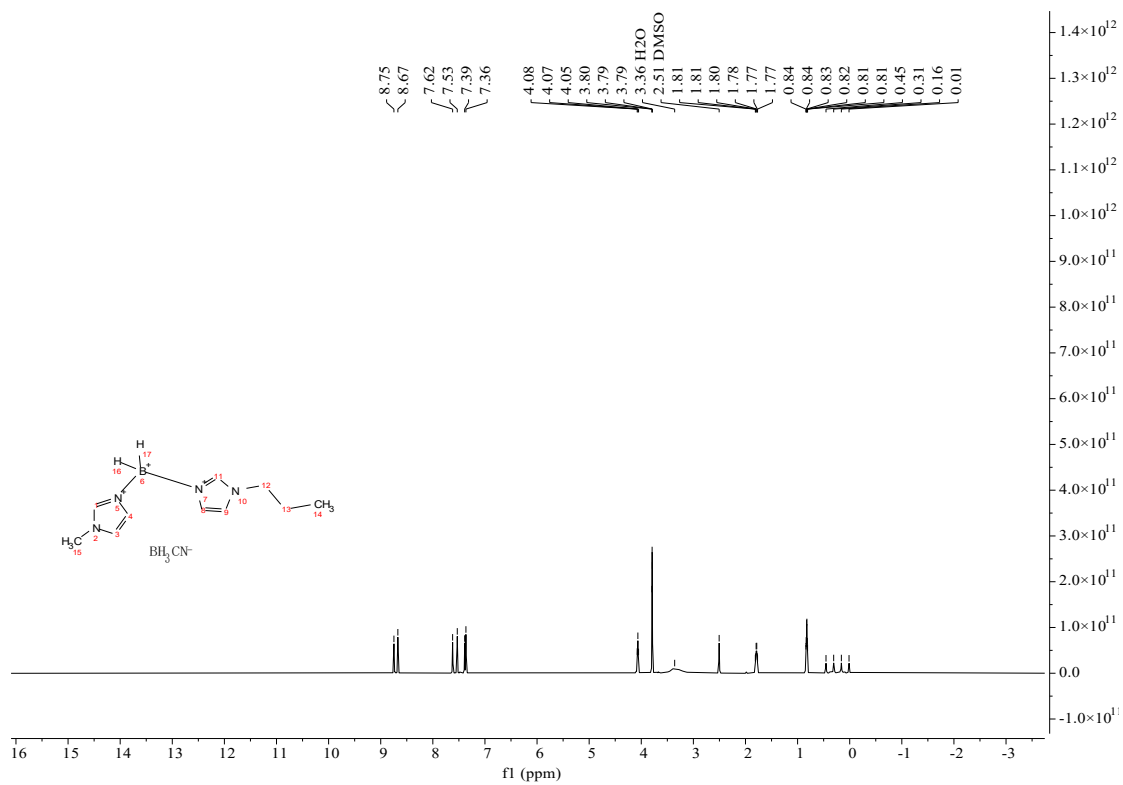

**Figure S30**  $^1\text{H NMR}$  (400 MHz) of (1-propyl-1H-imidazol-3-ium-1-yl)(1-methyl-1H-imidazol-3-ium-1-yl) dihydroboronium cyanoborohydride in DMSO- $\text{D}_6$ .

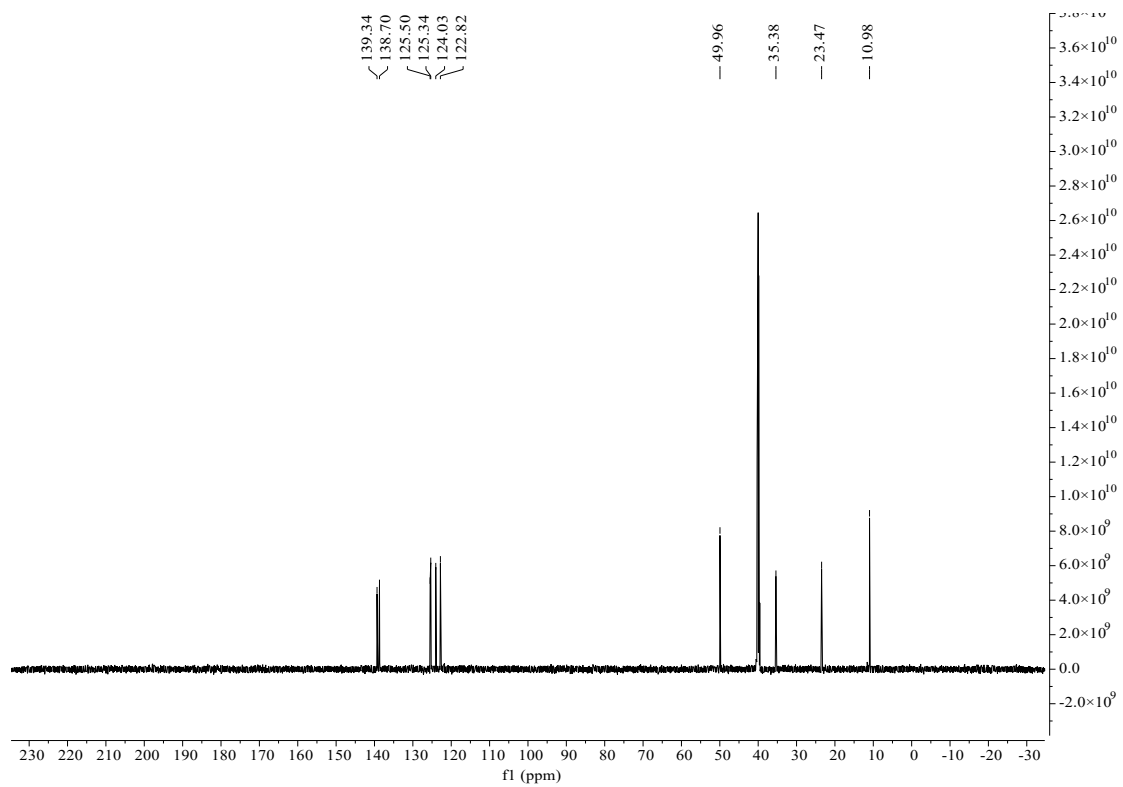

**Figure S31**  $^{13}\text{C}$ NMR (101 MHz) of (1-propyl-1H-imidazol-3-ium-1-yl)(1-methyl-1H-imidazol-3-ium-1-yl) dihydroboronium cyanoborohydride in  $\text{DMSO-D}_6$ .

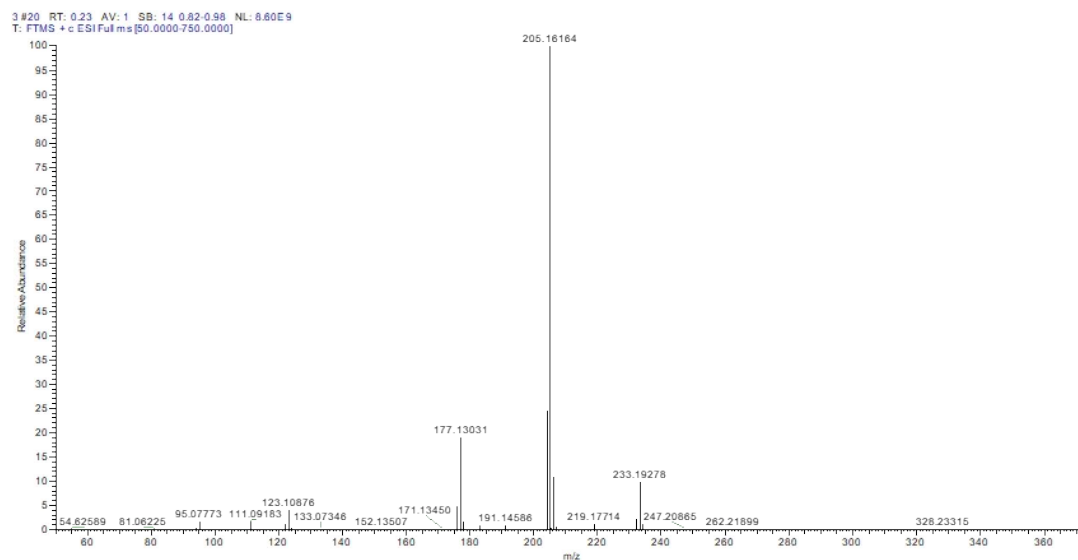

**Figure S32** HRMS-ESI spectrum of (1-propyl-1H-imidazol-3-ium-1-yl)(1-methyl-1H-imidazol-3-ium-1-yl) dihydroboronium cyanoborohydride (positive) solvent (H<sub>2</sub>O).

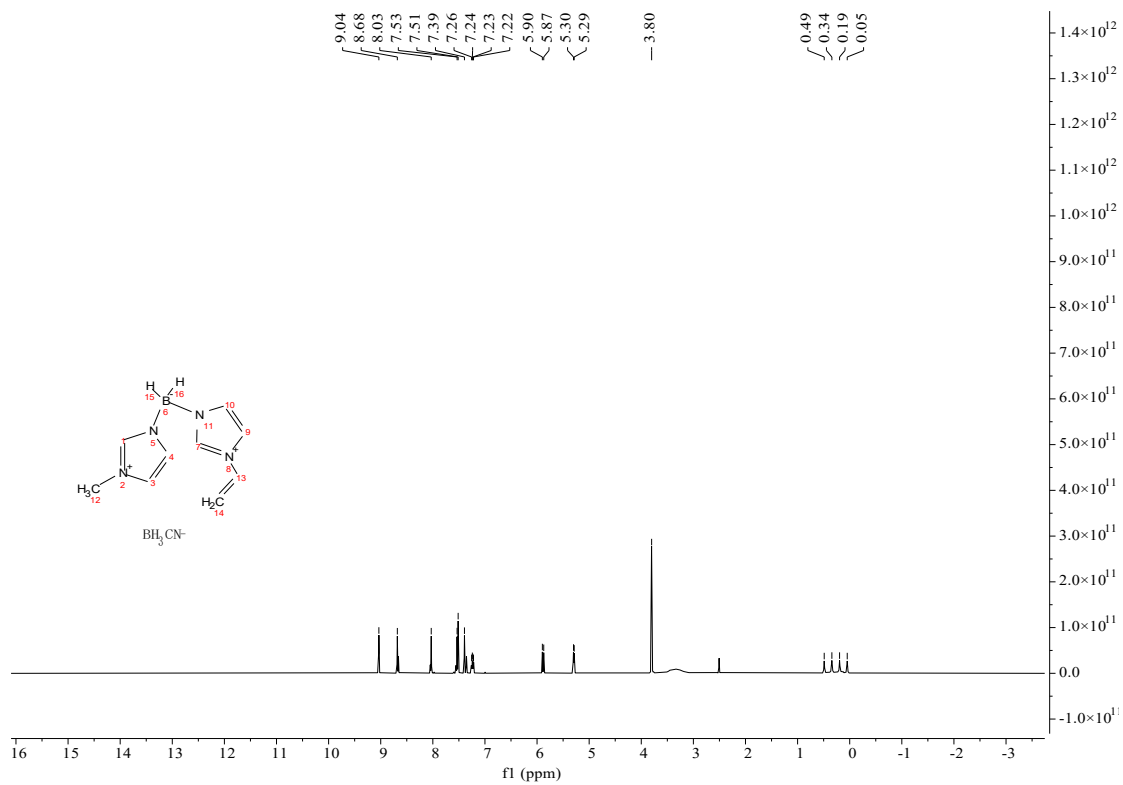

**Figure S33** <sup>1</sup>H NMR (400 MHz) of (1-vinyl-1H-imidazol-3-ium-1-yl)(1-methyl-1H-imidazol-3-ium-1-yl) dihydroboronium cyanoborohydride in DMSO-D<sub>6</sub>.



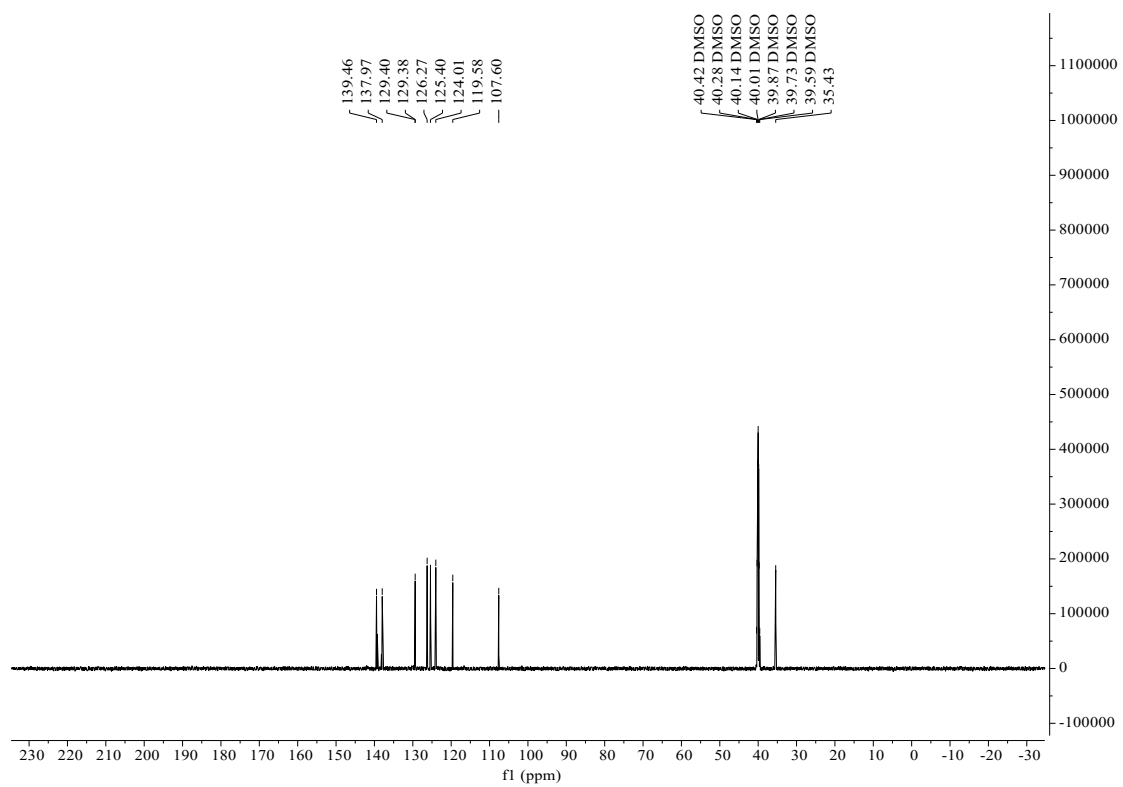

**Figure S34**  $^{13}\text{C}$ NMR (101 MHz) of (1-vinyl-1H-imidazol-3-ium-1-yl)(1-methyl-1H-imidazol-3-ium-1-yl) dihydroboronium cyanoborohydride in DMSO- $\text{D}_6$ .

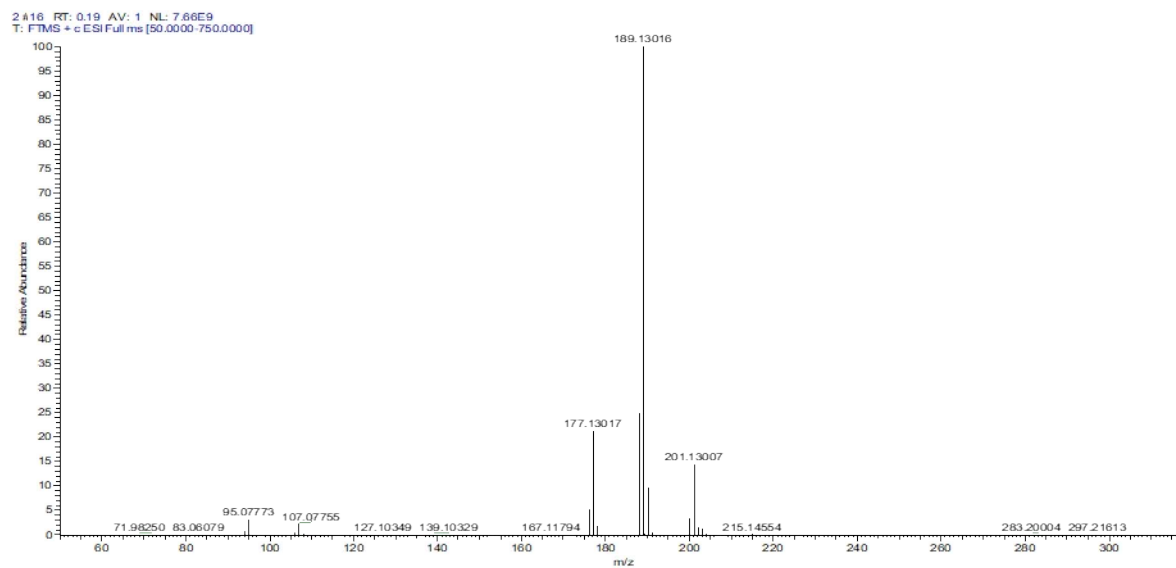

**Figure S35** HRMS-ESI SPECTRUM of (1-vinyl-1H-imidazol-3-ium-1-yl)(1-methyl-1H-imidazol-3-ium-1-yl) dihydroboronium cyanoborohydride (positive) solvent (H<sub>2</sub>O).

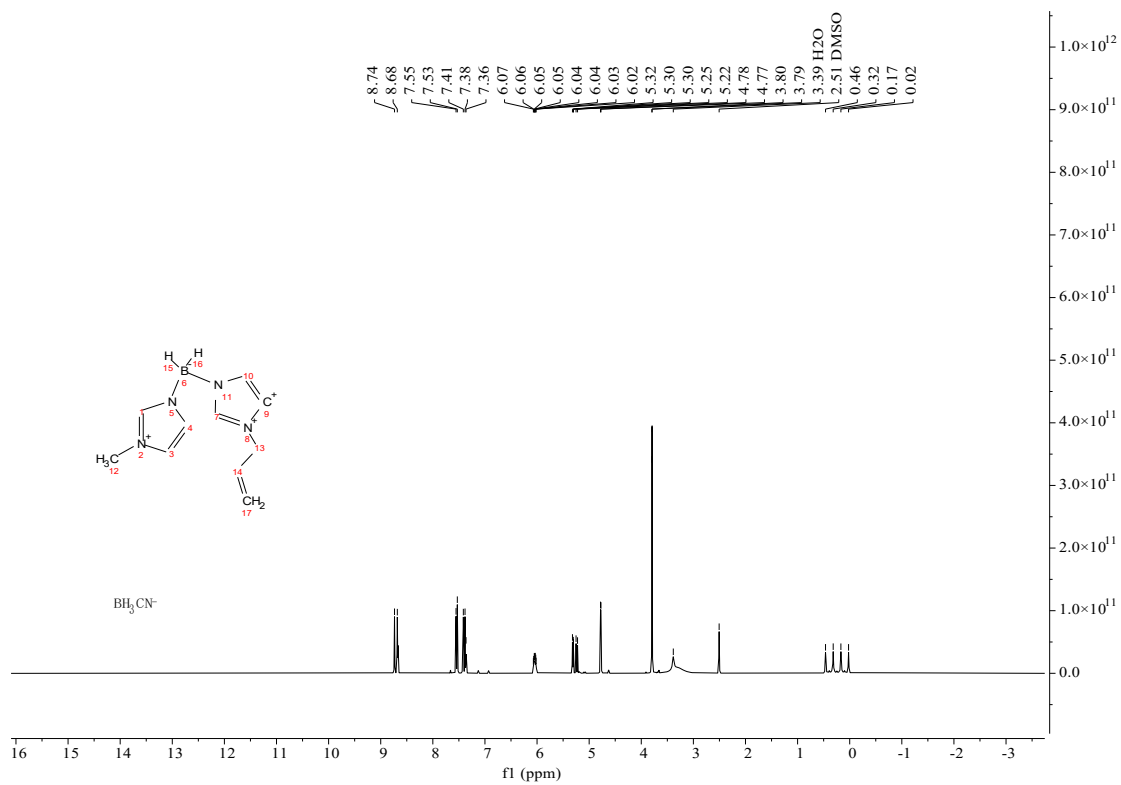

**Figure S36**  $^1\text{H}$ NMR (400 MHz) of (1-allyl-1H-imidazol-3-ium-1-yl)(1-methyl-1H-imidazol-3-ium-1-yl) dihydroboronium cyanoborohydride in DMSO- $\text{D}_6$ .

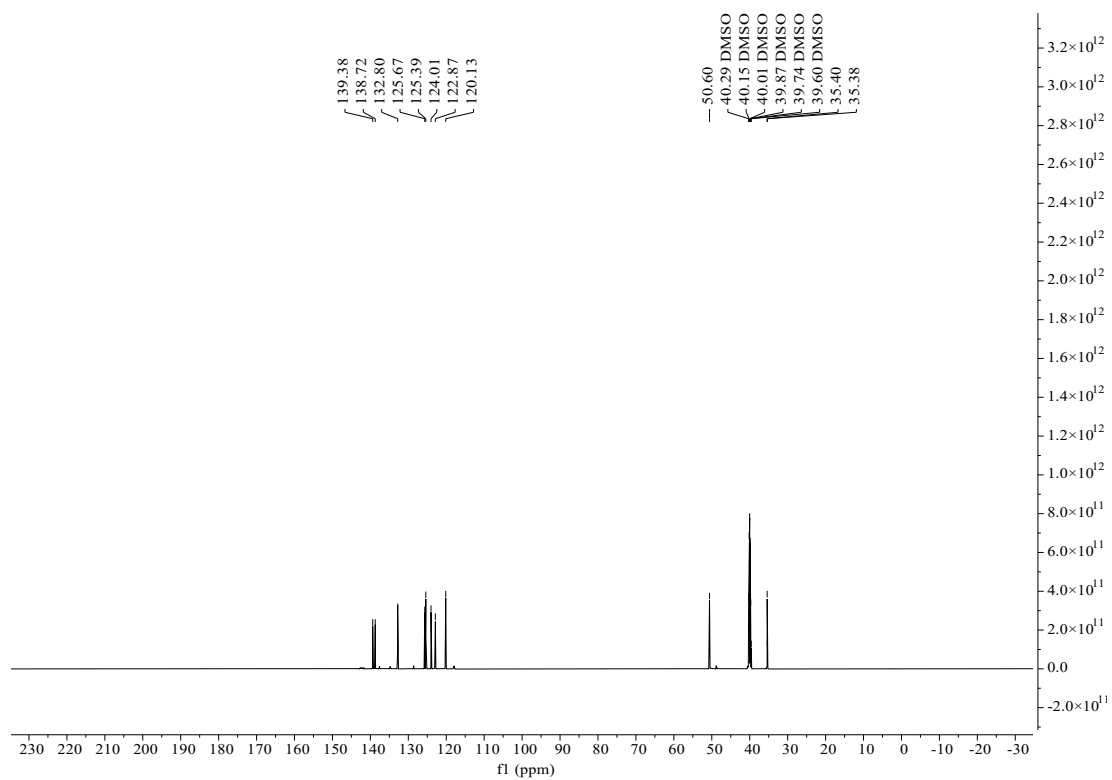

**Figure S37**  $^{13}\text{C}$ NMR (101 MHz) of (1-allyl-1H-imidazol-3-ium-1-yl)(1-methyl-1H-imidazol-3-ium-1-yl) dihydroboronium cyanoborohydride in  $\text{DMSO-D}_6$ .

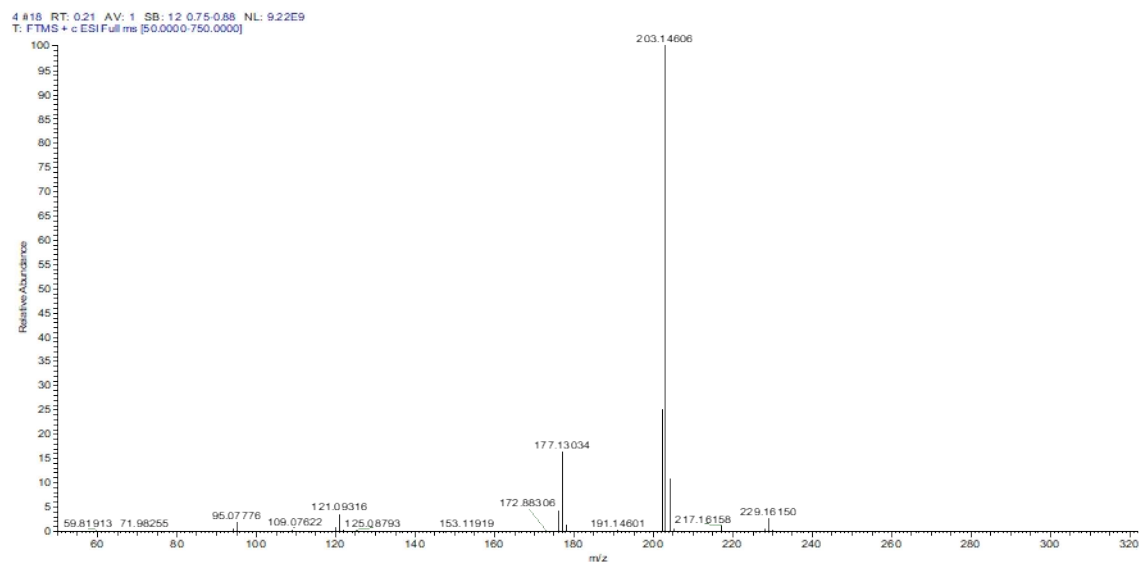

**Figure S38** HRMS-ESI SPECTRUM of (1-allyl-1H-imidazol-3-ium-1-yl)(1-methyl-1H-imidazol-3-ium-1-yl) dihydroboronium cyanoborohydride (positive) solvent (H<sub>2</sub>O).

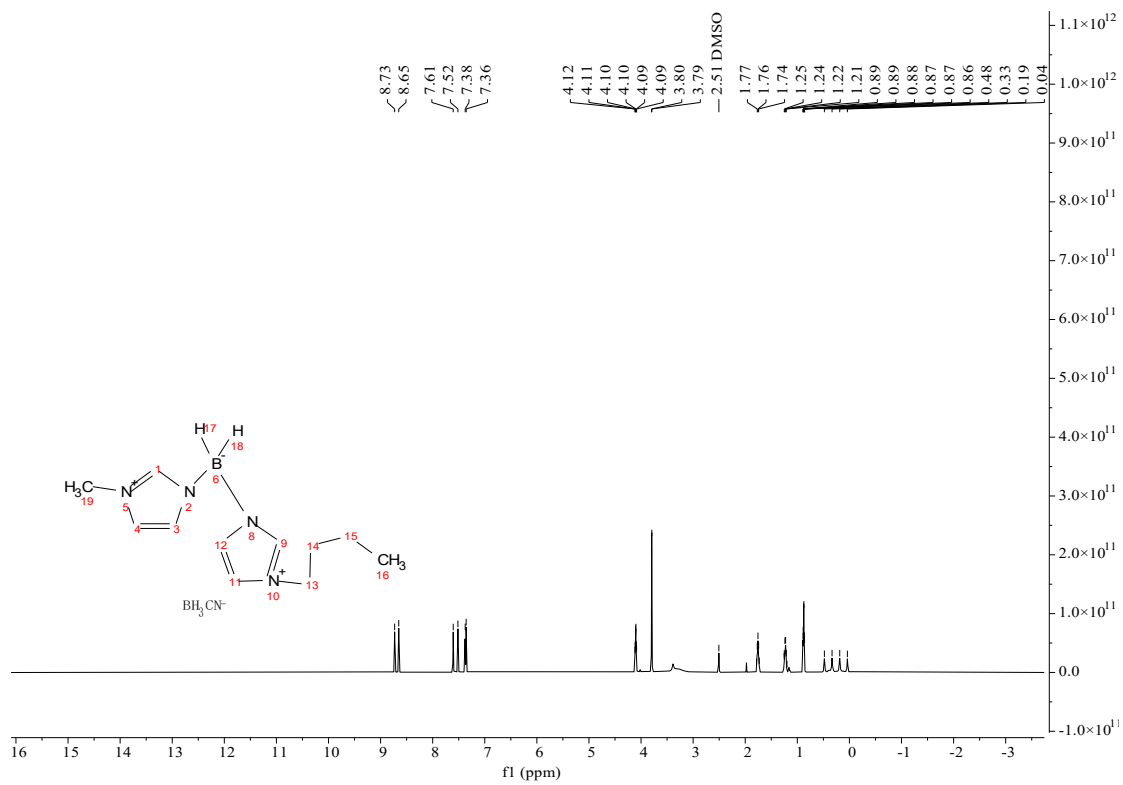

**Figure S39**  $^1\text{H}$ NMR (400 MHz) of (1-butyl-1H-imidazol-3-ium-1-yl)(1-methyl-1H-imidazol-3-ium-1-yl) dihydroboronium cyanoborohydride in DMSO- $\text{D}_6$ .

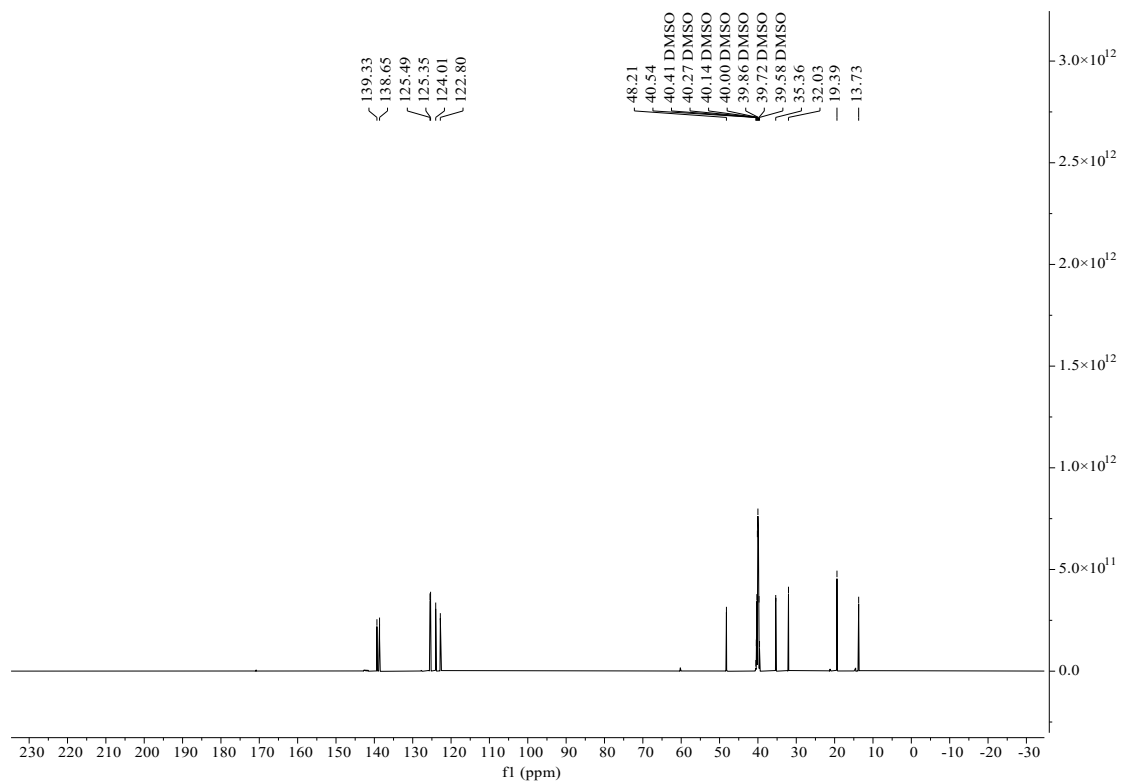

**Figure S40**  $^{13}\text{C}$ NMR (101 MHz) of (1-butyl-1H-imidazol-3-ium-1-yl)(1-methyl-1H-imidazol-3-ium-1-yl) dihydroboronium cyanoborohydride in  $\text{DMSO-D}_6$ .

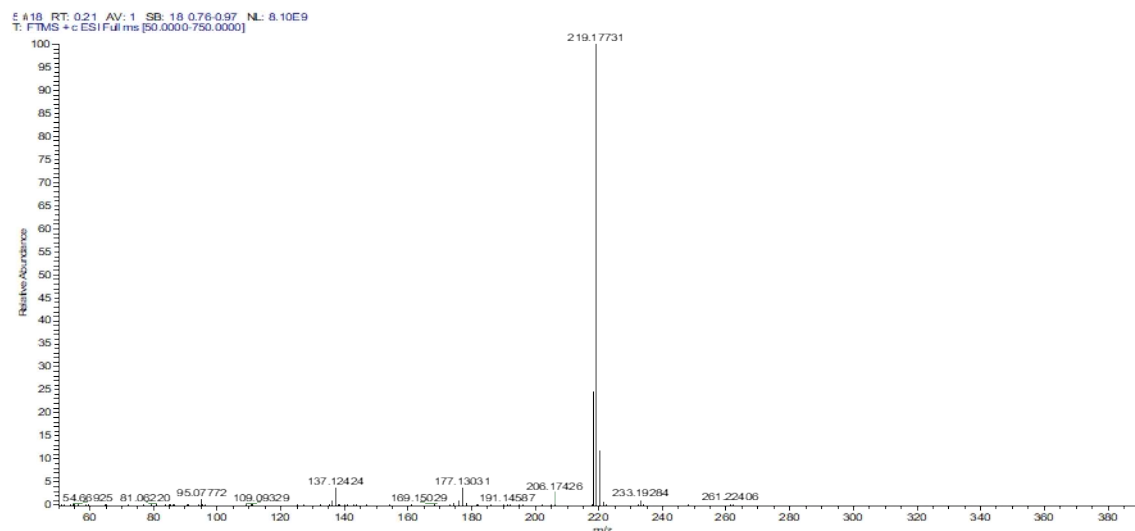

**Figure S41** HRMS-ESI SPECTRUM of (1-butyl-1H-imidazol-3-ium-1-yl)(1-methyl-1H-imidazol-3-ium-1-yl) dihydroboronium cyanoborohydride (positive) solvent ( $\text{H}_2\text{O}$ ).

### 3.Computational details

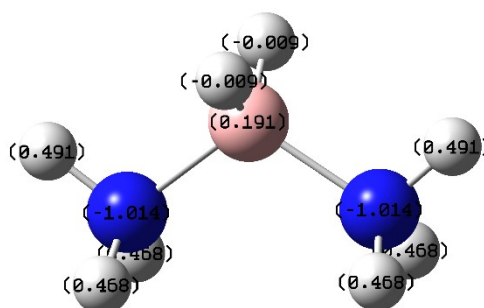

**Figure. S42.** NPA charge of the  $\text{BH}_2(\text{NH}_3)_2^+$ .

#### 3.1 Geometry optimized coordinate for the cations

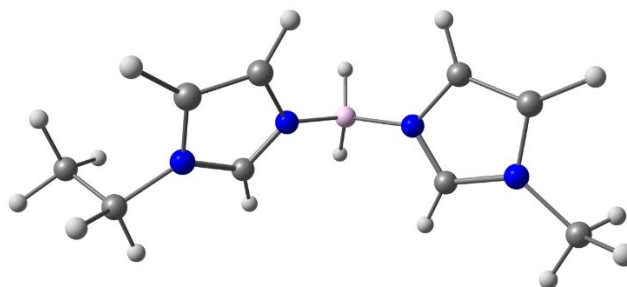



|   |              |              |              |
|---|--------------|--------------|--------------|
| H | 0.353929000  | 0.217453000  | 2.274392000  |
| H | 0.448350000  | -1.765986000 | 1.868779000  |
| N | -0.822200000 | -0.486725000 | 0.486418000  |
| C | -1.244643000 | -1.341313000 | -0.514614000 |
| C | -1.738504000 | 0.478514000  | 0.589134000  |
| C | -2.424954000 | -0.867583000 | -1.013917000 |
| H | -0.686210000 | -2.222696000 | -0.786145000 |
| H | -1.705560000 | 1.289577000  | 1.300044000  |
| H | -3.067946000 | -1.244464000 | -1.793767000 |
| N | 1.762961000  | -0.421474000 | 0.618249000  |
| C | 2.419163000  | 0.733229000  | 0.487746000  |
| C | 2.506443000  | -1.387299000 | -0.033576000 |
| H | 2.109960000  | 1.676139000  | 0.911391000  |
| C | 3.615105000  | -0.791366000 | -0.565010000 |
| H | 2.204405000  | -2.422451000 | -0.043740000 |
| H | 4.438988000  | -1.195686000 | -1.131987000 |
| N | 3.543705000  | 0.547922000  | -0.225352000 |
| N | -2.723026000 | 0.282291000  | -0.305223000 |
| C | 4.537446000  | 1.573402000  | -0.558013000 |
| H | 5.504169000  | 1.302622000  | -0.128866000 |
| H | 4.626034000  | 1.663992000  | -1.642425000 |
| H | 4.214926000  | 2.527860000  | -0.141856000 |
| C | -3.939692000 | 1.106593000  | -0.452621000 |
| H | -4.079230000 | 1.287880000  | -1.521782000 |
| H | -3.727246000 | 2.069430000  | 0.018311000  |
| C | -5.171819000 | 0.448437000  | 0.166799000  |
| H | -6.036563000 | 1.104630000  | 0.033171000  |
| H | -5.398670000 | -0.508784000 | -0.311206000 |
| H | -5.033640000 | 0.277780000  | 1.238269000  |
| B | 0.430588000  | -0.645415000 | 1.440640000  |

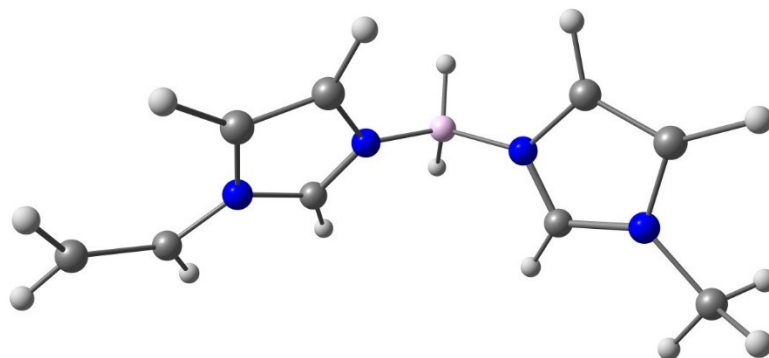

|   |              |              |              |
|---|--------------|--------------|--------------|
| H | 0.396146000  | -0.256448000 | 2.373047000  |
| H | 0.499298000  | -2.125075000 | 1.594674000  |
| N | -0.887937000 | -0.650760000 | 0.563699000  |
| C | -1.356661000 | -1.311036000 | -0.559336000 |
| C | -1.816085000 | 0.237418000  | 0.910149000  |
| C | -2.577245000 | -0.799357000 | -0.887002000 |
| H | -0.798896000 | -2.106528000 | -1.026823000 |
| H | -1.759345000 | 0.895978000  | 1.762914000  |
| H | -3.259471000 | -1.057387000 | -1.679362000 |
| N | 1.695785000  | -0.528829000 | 0.535108000  |
| C | 2.303486000  | 0.659551000  | 0.561246000  |
| C | 2.421438000  | -1.337734000 | -0.319333000 |
| H | 1.995645000  | 1.503356000  | 1.159127000  |
| C | 3.468697000  | -0.612202000 | -0.812735000 |
| H | 2.153186000  | -2.368847000 | -0.485911000 |
| H | 4.262408000  | -0.878579000 | -1.493034000 |
| N | 3.378334000  | 0.646504000  | -0.245546000 |
| N | -2.860426000 | 0.182043000  | 0.053560000  |
| C | 4.313615000  | 1.755513000  | -0.459942000 |
| H | 5.310460000  | 1.468868000  | -0.118957000 |
| H | 4.344246000  | 2.011529000  | -1.520742000 |
| H | 3.973811000  | 2.620623000  | 0.109489000  |
| B | 0.433440000  | -0.945341000 | 1.388955000  |
| C | -4.020457000 | 1.002317000  | 0.157179000  |
| H | -4.019269000 | 1.615418000  | 1.051263000  |

|   |              |             |              |
|---|--------------|-------------|--------------|
| C | -5.012724000 | 1.030109000 | -0.729039000 |
| H | -5.032556000 | 0.428533000 | -1.630973000 |
| H | -5.857553000 | 1.685087000 | -0.554345000 |

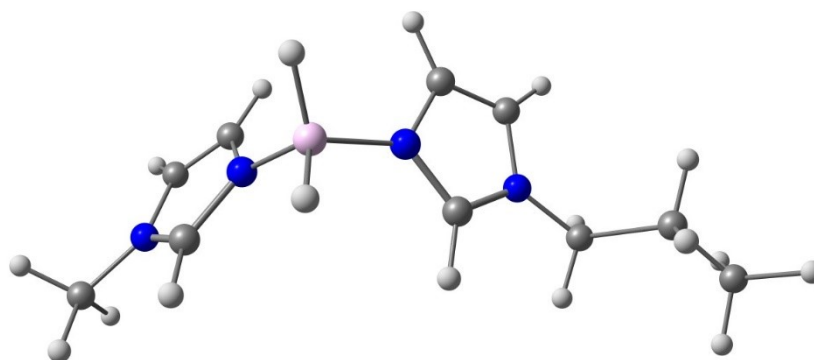

|   |              |              |              |
|---|--------------|--------------|--------------|
| H | -0.926201000 | -0.030185000 | 2.290925000  |
| H | -1.197394000 | 1.918573000  | 1.810493000  |
| N | 0.338364000  | 0.798827000  | 0.597282000  |
| C | 0.921575000  | 1.886611000  | -0.024914000 |
| C | 1.158718000  | -0.240266000 | 0.420260000  |
| C | 2.100334000  | 1.479990000  | -0.583961000 |
| H | 0.464632000  | 2.863111000  | 0.000452000  |
| H | 0.996730000  | -1.233993000 | 0.808484000  |
| H | 2.844905000  | 2.022141000  | -1.145093000 |
| N | -2.209361000 | 0.371685000  | 0.484187000  |
| C | -3.013079000 | -0.667304000 | 0.715635000  |
| C | -2.712301000 | 1.036520000  | -0.618468000 |
| H | -2.897933000 | -1.370137000 | 1.526002000  |
| C | -3.827300000 | 0.374598000  | -1.048439000 |
| H | -2.252509000 | 1.931925000  | -1.004592000 |
| H | -4.501535000 | 0.572338000  | -1.867175000 |
| N | -4.005255000 | -0.697166000 | -0.192275000 |
| N | 2.233209000  | 0.133650000  | -0.295028000 |
| C | -5.092643000 | -1.678323000 | -0.254517000 |
| H | -6.053559000 | -1.170081000 | -0.152956000 |

|   |              |              |              |
|---|--------------|--------------|--------------|
| H | -5.055592000 | -2.213221000 | -1.205625000 |
| H | -4.975275000 | -2.389153000 | 0.563495000  |
| B | -1.005698000 | 0.798951000  | 1.423767000  |
| C | 3.387993000  | -0.718724000 | -0.638594000 |
| H | 3.055121000  | -1.756925000 | -0.552868000 |
| H | 3.624841000  | -0.536181000 | -1.691123000 |
| C | 4.606536000  | -0.458680000 | 0.255187000  |
| H | 4.897257000  | 0.595639000  | 0.174300000  |
| H | 4.325891000  | -0.630013000 | 1.301466000  |
| C | 5.786531000  | -1.357400000 | -0.131312000 |
| H | 6.106676000  | -1.178532000 | -1.163656000 |
| H | 6.643065000  | -1.162240000 | 0.519320000  |
| H | 5.532500000  | -2.418921000 | -0.035104000 |

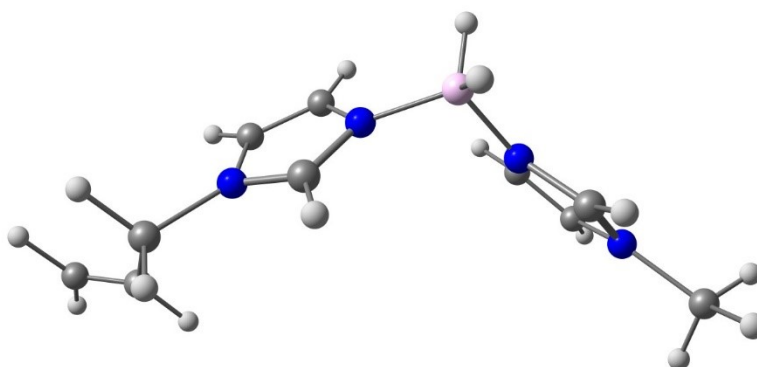

|   |              |              |              |
|---|--------------|--------------|--------------|
| C | -2.954091000 | -0.139519000 | -0.805271000 |
| N | -3.796499000 | -0.748484000 | 0.048427000  |
| C | -3.452873000 | -0.360324000 | 1.330857000  |
| C | -2.393348000 | 0.493551000  | 1.209451000  |
| N | -2.088066000 | 0.620218000  | -0.132762000 |
| C | -4.897966000 | -1.645322000 | -0.314679000 |
| B | -1.023665000 | 1.580022000  | -0.810045000 |
| C | 1.218565000  | 0.276231000  | -1.010555000 |
| N | 2.412265000  | 0.199411000  | -0.397065000 |
| C | 2.395329000  | 1.070582000  | 0.677535000  |
| C | 1.162721000  | 1.660167000  | 0.680274000  |

|   |              |              |              |
|---|--------------|--------------|--------------|
| N | 0.432696000  | 1.150511000  | -0.377749000 |
| C | 3.570044000  | -0.610616000 | -0.842625000 |
| C | 4.140500000  | -1.444576000 | 0.271194000  |
| C | 5.413038000  | -1.365705000 | 0.666003000  |
| H | -2.989446000 | -0.235961000 | -1.879349000 |
| H | -3.988013000 | -0.712132000 | 2.199029000  |
| H | -1.848906000 | 1.027157000  | 1.971870000  |
| H | -4.747256000 | -2.622968000 | 0.147414000  |
| H | -5.846006000 | -1.219745000 | 0.020343000  |
| H | -4.919305000 | -1.758864000 | -1.398597000 |
| H | -1.128914000 | 1.437747000  | -1.999289000 |
| H | -1.207968000 | 2.697943000  | -0.415236000 |
| H | 0.949611000  | -0.271894000 | -1.900292000 |
| H | 3.246424000  | 1.190279000  | 1.328530000  |
| H | 0.757112000  | 2.417460000  | 1.332173000  |
| H | 3.204935000  | -1.239773000 | -1.660696000 |
| H | 4.324639000  | 0.068453000  | -1.250871000 |
| H | 3.461565000  | -2.158245000 | 0.735521000  |
| H | 5.801906000  | -2.009580000 | 1.448316000  |
| H | 6.113654000  | -0.668393000 | 0.212299000  |

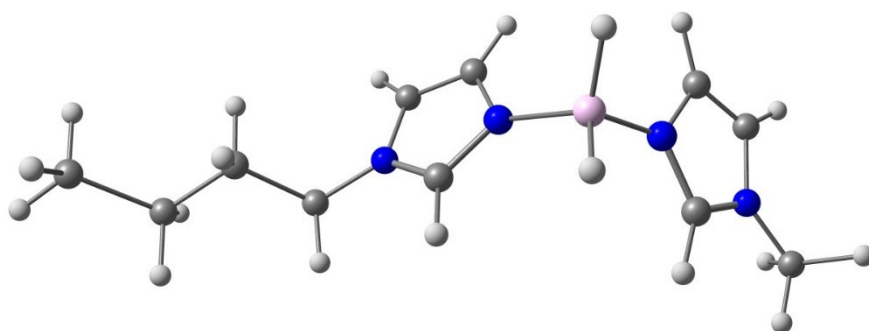

|   |             |              |              |
|---|-------------|--------------|--------------|
| C | 3.324881000 | -0.819414000 | 0.522715000  |
| N | 4.468521000 | -0.709006000 | -0.175635000 |
| C | 4.628257000 | 0.621322000  | -0.520363000 |
| C | 3.551903000 | 1.288309000  | -0.007201000 |
| N | 2.740535000 | 0.374623000  | 0.638619000  |
| C | 5.400245000 | -1.796788000 | -0.488827000 |

|   |              |              |              |
|---|--------------|--------------|--------------|
| B | 1.412391000  | 0.682888000  | 1.442139000  |
| C | -0.789631000 | -0.283065000 | 0.482836000  |
| N | -1.741404000 | 0.014023000  | -0.418845000 |
| C | -1.374812000 | 1.191781000  | -1.044723000 |
| C | -0.187328000 | 1.578132000  | -0.490520000 |
| N | 0.171582000  | 0.643482000  | 0.462531000  |
| C | -2.994106000 | -0.735118000 | -0.638476000 |
| C | -4.203586000 | -0.081088000 | 0.038736000  |
| C | -5.494597000 | -0.876695000 | -0.204199000 |
| C | -6.715033000 | -0.236625000 | 0.466925000  |
| H | 2.951727000  | -1.738664000 | 0.946896000  |
| H | 5.483334000  | 0.970177000  | -1.077911000 |
| H | 3.315717000  | 2.340245000  | -0.027295000 |
| H | 6.373233000  | -1.590497000 | -0.038440000 |
| H | 5.006702000  | -2.728387000 | -0.082078000 |
| H | 5.506086000  | -1.892184000 | -1.571274000 |
| H | 1.257274000  | -0.190624000 | 2.253798000  |
| H | 1.507152000  | 1.788996000  | 1.896976000  |
| H | -0.811200000 | -1.137687000 | 1.141119000  |
| H | -1.982079000 | 1.646495000  | -1.811498000 |
| H | 0.416047000  | 2.448845000  | -0.690837000 |
| H | -3.140169000 | -0.812050000 | -1.719957000 |
| H | -2.831381000 | -1.746963000 | -0.257183000 |
| H | -4.011271000 | 0.000998000  | 1.116147000  |
| H | -4.323388000 | 0.942274000  | -0.339195000 |
| H | -5.672447000 | -0.961051000 | -1.284619000 |
| H | -5.366688000 | -1.901674000 | 0.169031000  |
| H | -7.618089000 | -0.823118000 | 0.274697000  |
| H | -6.584307000 | -0.173024000 | 1.552829000  |
| H | -6.889998000 | 0.777097000  | 0.089983000  |

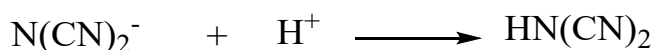

**Figure S41** protonation reaction of dicyandiamide anion

**Table S1** Heat of formation of the compound

| Compounds                                        | Heat of the formation |
|--------------------------------------------------|-----------------------|
| 1-methylimidazole                                | 127.1 <sup>[a]</sup>  |
| 1-ethylimidazole                                 | 97.91 <sup>[b]</sup>  |
| 1-propylimidazole                                | 76.2 <sup>[b]</sup>   |
| 1-butylimidazole                                 | 55.4 <sup>[b]</sup>   |
| 1-vinylimidazole                                 | 223.7 <sup>[b]</sup>  |
| 1-allylimidazole                                 | 212.8 <sup>[b]</sup>  |
| NH <sub>3</sub>                                  | -45.9 <sup>[a]</sup>  |
| BH <sub>2</sub> (NH <sub>3</sub> ) <sup>2+</sup> | 418.46 <sup>[b]</sup> |

[a] The data was got from the NIST [b]Heat of formation was calculated based on G2

**Table S2** Enthalpies of the gas-phase species of cations and anions (based on isodesmic reactions).

| Compound                                                     | E <sub>0</sub> (a.u.) | ZPE(a.u.) | T <sub>C</sub> (a.u.) | H <sub>T</sub> KJ/mol |
|--------------------------------------------------------------|-----------------------|-----------|-----------------------|-----------------------|
| 1-methylimidazole                                            | -264.8298954          | 0.098967  | 0.105307              | 15.9798432            |
| 1-vinylimidazole                                             | -302.80676            | 0.103732  | 0.110759              | 17.71141296           |
| 2-buthylimidazole                                            | -382.4209903          | 0.184402  | 0.194616              | 25.74418272           |
| 1-propylimidazole                                            | -343.2252806          | 0.155963  | 0.164841              | 22.37682144           |
| 1-allylimidazole                                             | -342.0020938          | 0.132327  | 0.140673              | 21.03592608           |
| 1-ethylimidazole                                             | -304.0292598          | 0.12753   | 0.135051              | 18.95653008           |
| CH <sub>4</sub>                                              | -40.3796279           | 0.044816  | 0.048629              | 9.61059024            |
| NH <sub>3</sub>                                              | -56.4154632           | 0.034373  | 0.038191              | 9.62319264            |
| BH <sub>2</sub> (NH <sub>3</sub> ) <sub>2</sub> <sup>+</sup> | -138.6134981          | 0.104521  | 0.110416              | 14.8582296            |

**Table S3** Enthalpies of the gas-phase species of cations (based on isodesmic reactions)

| Compound | E <sub>0</sub> (a.u.) | ZPE(a.u.) | T <sub>C</sub> (a.u.) | H <sub>T</sub> KJ/mol |
|----------|-----------------------|-----------|-----------------------|-----------------------|
| 2a       | -594.7005807          | 0.2562    | 0.271208              | 37.82736384           |
| 2b       | -593.474067           | 0.232351  | 0.24681               | 36.44362032           |
| 2c       | -633.8972456          | 0.284599  | 0.301002              | 41.34343344           |

|    |              |          |          |             |
|----|--------------|----------|----------|-------------|
| 2d | -632.6742095 | 0.261018 | 0.276829 | 39.85130928 |
| 2e | -673.0934798 | 0.312987 | 0.330777 | 44.8393392  |

**Table S4** Optimized structures of cations of the ionic liquid

| Ionic liquids | Cations |
|---------------|---------|
| 3a            |         |
| 3b            |         |
| 3c            |         |
| 3d            |         |



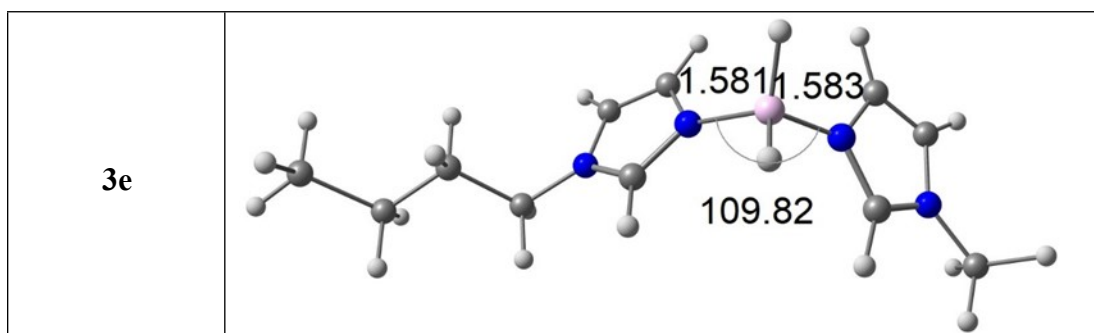

**Table S7** The lattice energy with heat of formation of cation and anion of ionic salts

| Compound | $\Delta H_L$ [kJ mol <sup>-1</sup> ] | $\Delta H_f^{\ddagger}$<br>(cation)<br>[kJ mol <sup>-1</sup> ] | $\Delta H_f$<br>(anion) [kJ mol <sup>-1</sup> ] |
|----------|--------------------------------------|----------------------------------------------------------------|-------------------------------------------------|
| 3a       | 430.07                               | 572.51                                                         | 118.6                                           |
| 3b       | 430.33                               | 708.55                                                         | 118.6                                           |
| 3c       | 419.00                               | 549.99                                                         | 118.6                                           |
| 3d       | 421.89                               | 685.29                                                         | 118.6                                           |
| 3e       | 413.56                               | 526.93                                                         | 118.6                                           |
| 4a       | 433.04                               | 572.51                                                         | -80.6                                           |
| 4b       | 422.95                               | 708.55                                                         | -80.6                                           |
| 4c       | 436.47                               | 549.99                                                         | -80.6                                           |
| 4d       | 429.36                               | 685.29                                                         | -80.6                                           |
| 4e       | 414.84                               | 526.93                                                         | -80.6                                           |
